# Supplementary material
Source: PubMed Central journal article supplement (PMC3220053)

**SUPPORTING INFORMATION – 2**

**Reversible Alkene Insertion into the Pd–N Bond of Pd(II)-Sulfonamidates and Implications for Catalytic Amidation Reactions**

*Paul B. White and Shannon S. Stahl\**

Department of Chemistry, University of Wisconsin–Madison, 1101 University Avenue, Madison, Wisconsin 53706, United States

**Copies of  $^1\text{H}$  and  $^{13}\text{C}$  NMR Spectra for Isolated Compounds.**

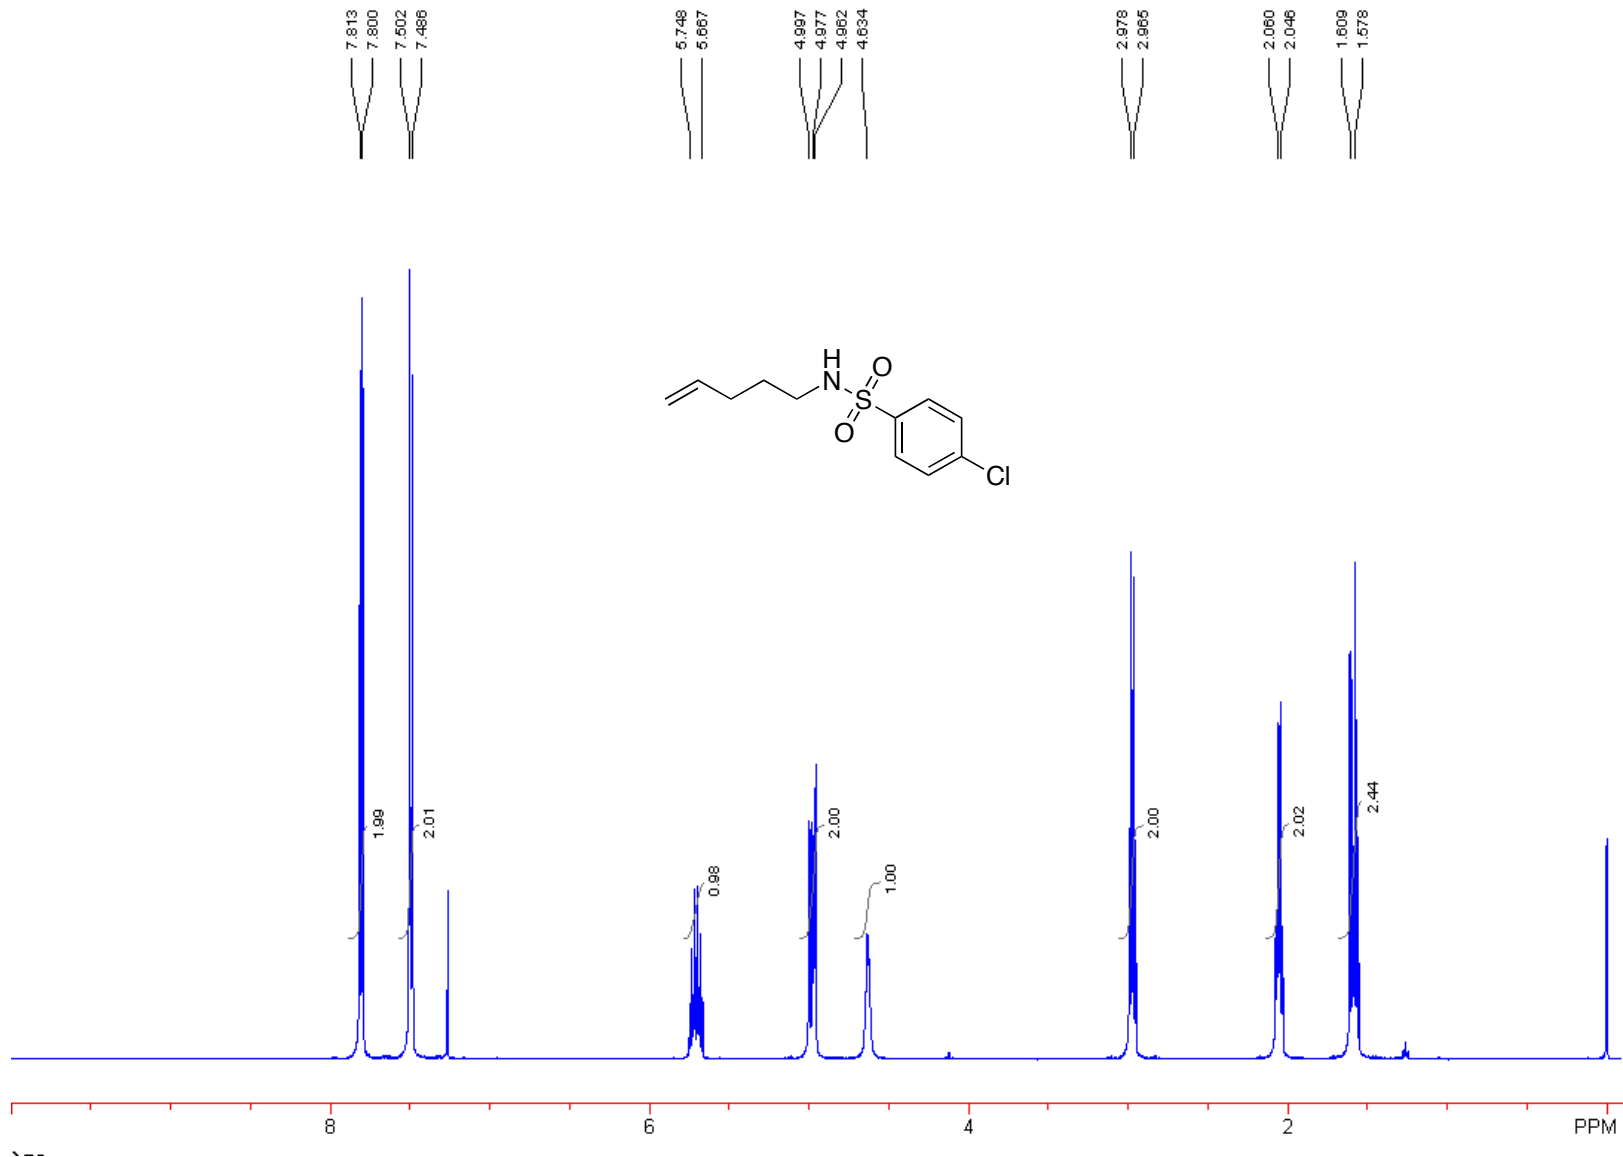

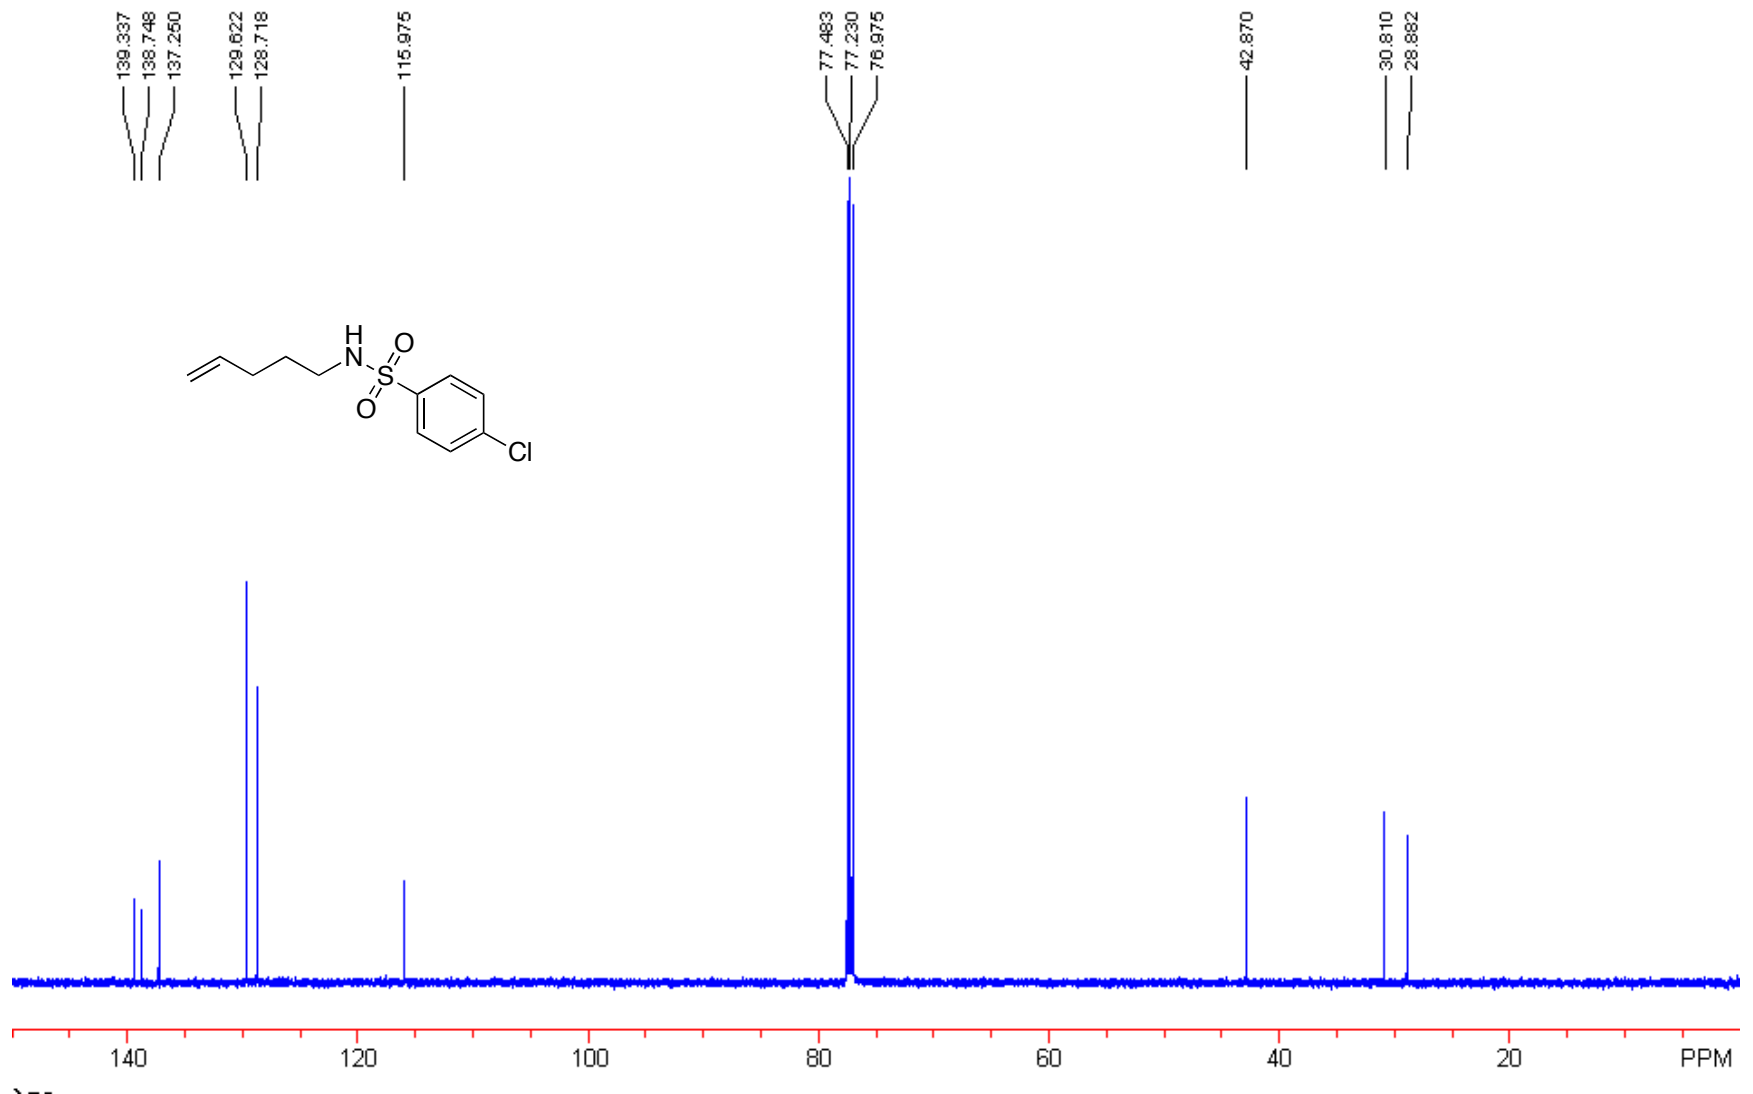

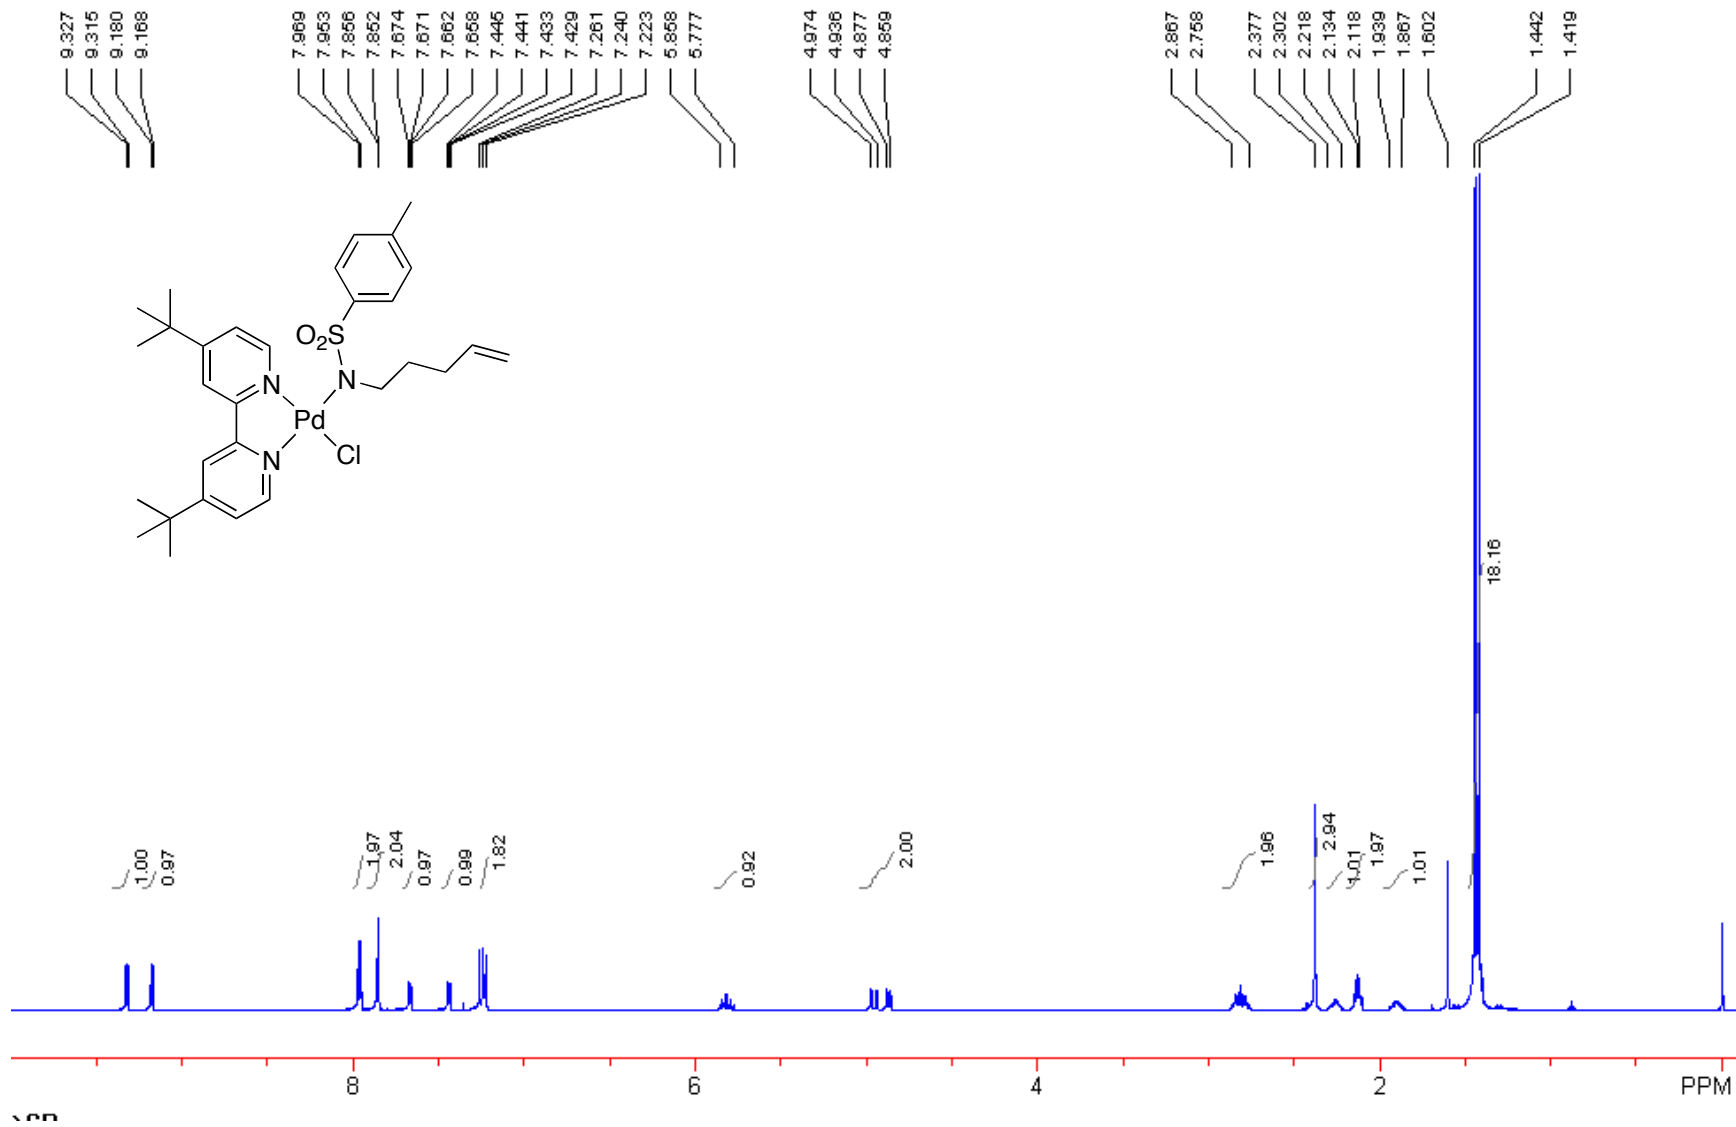

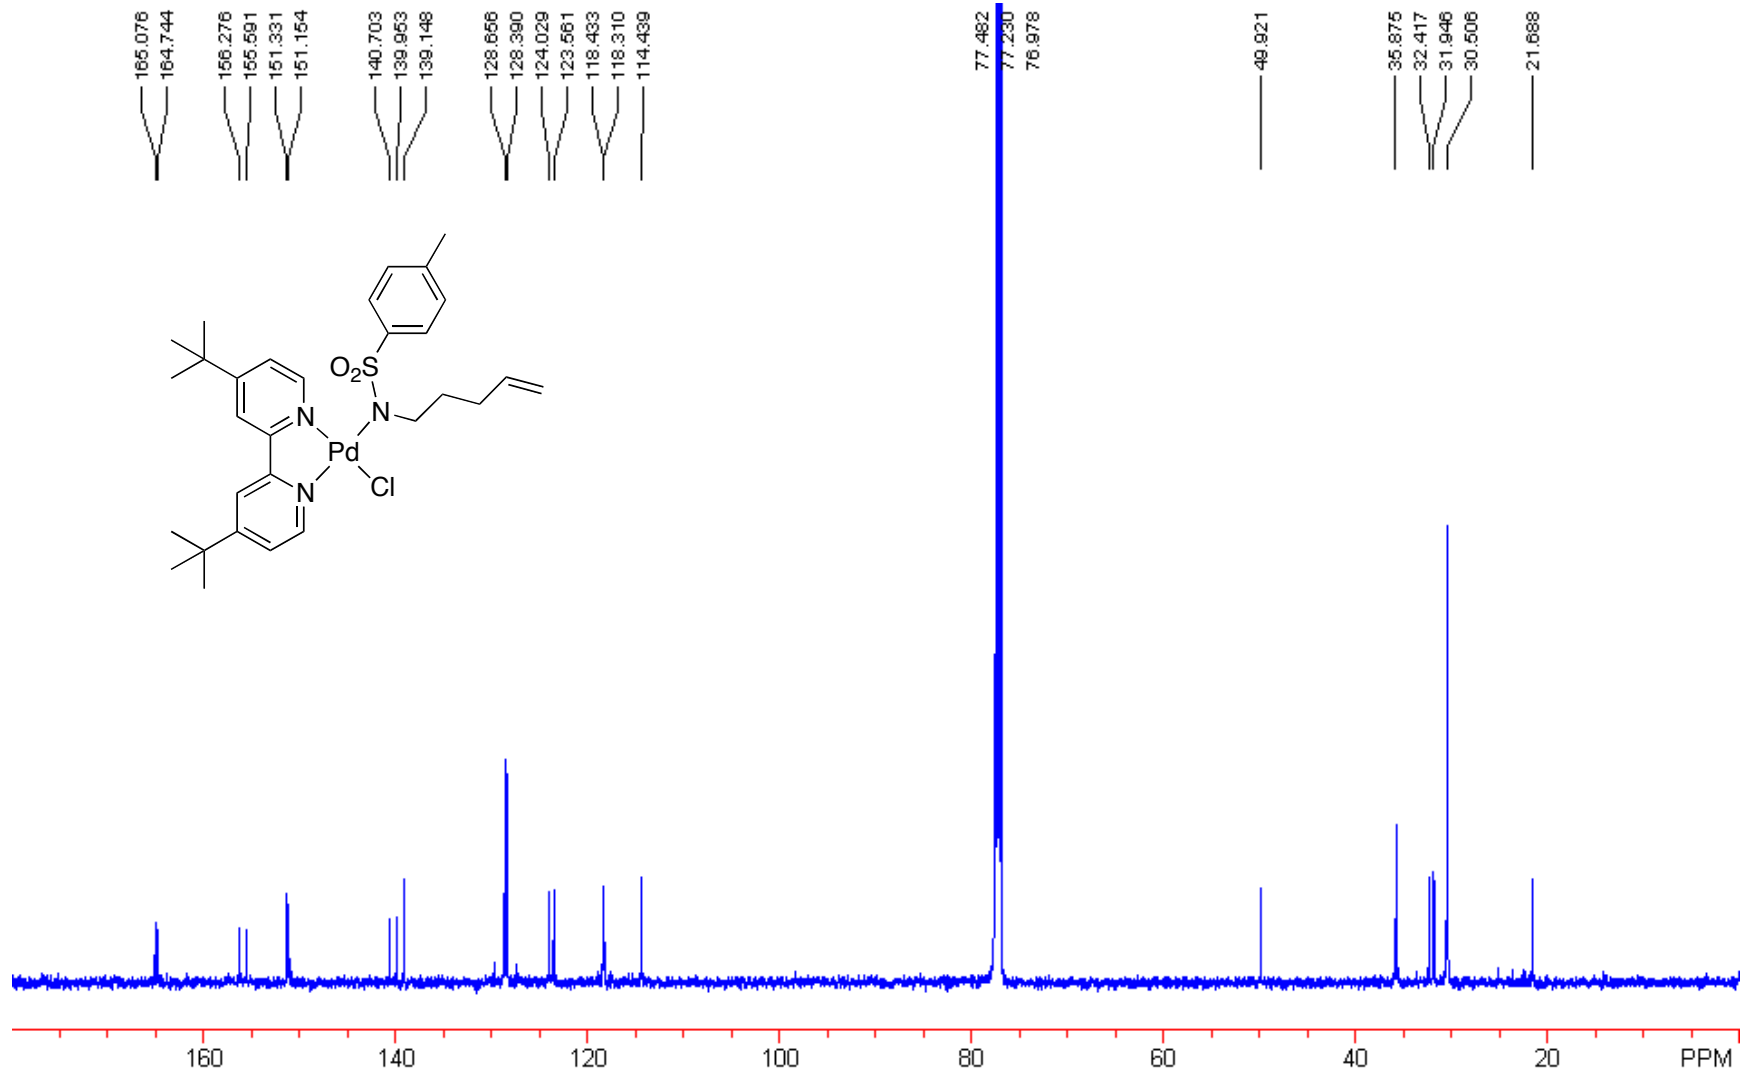

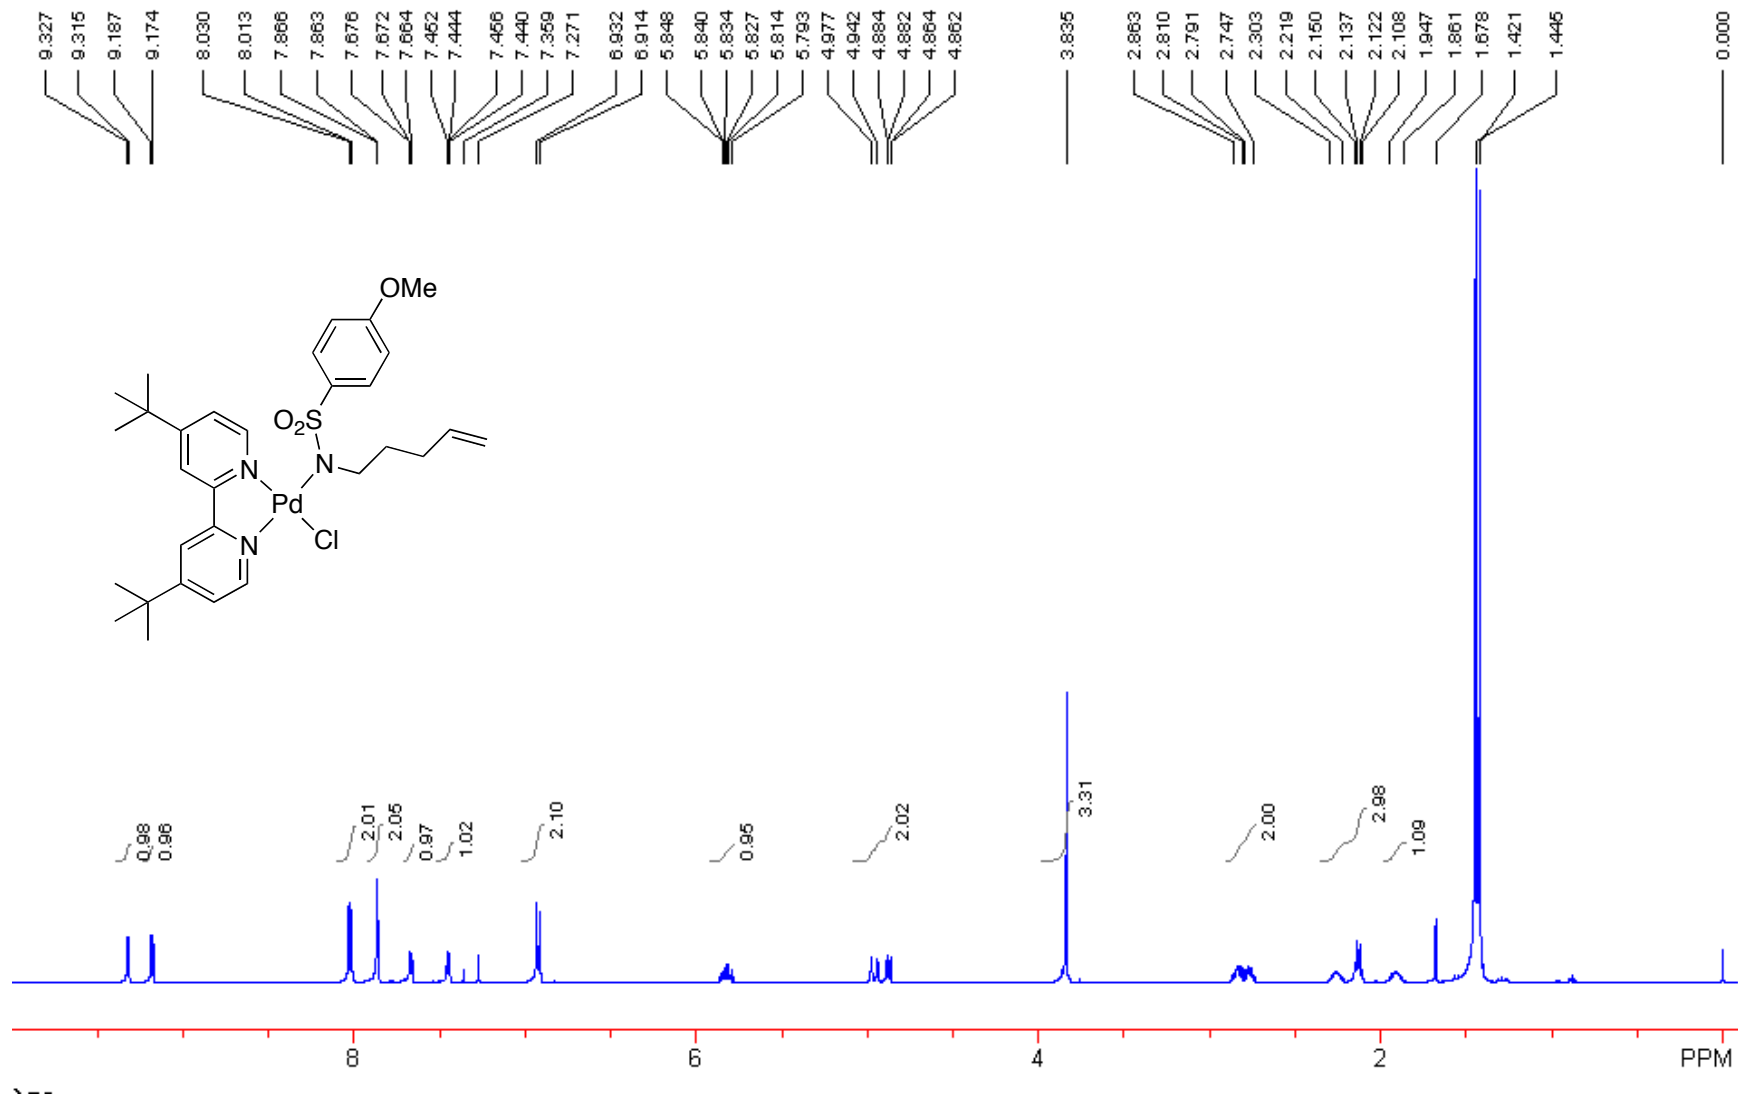

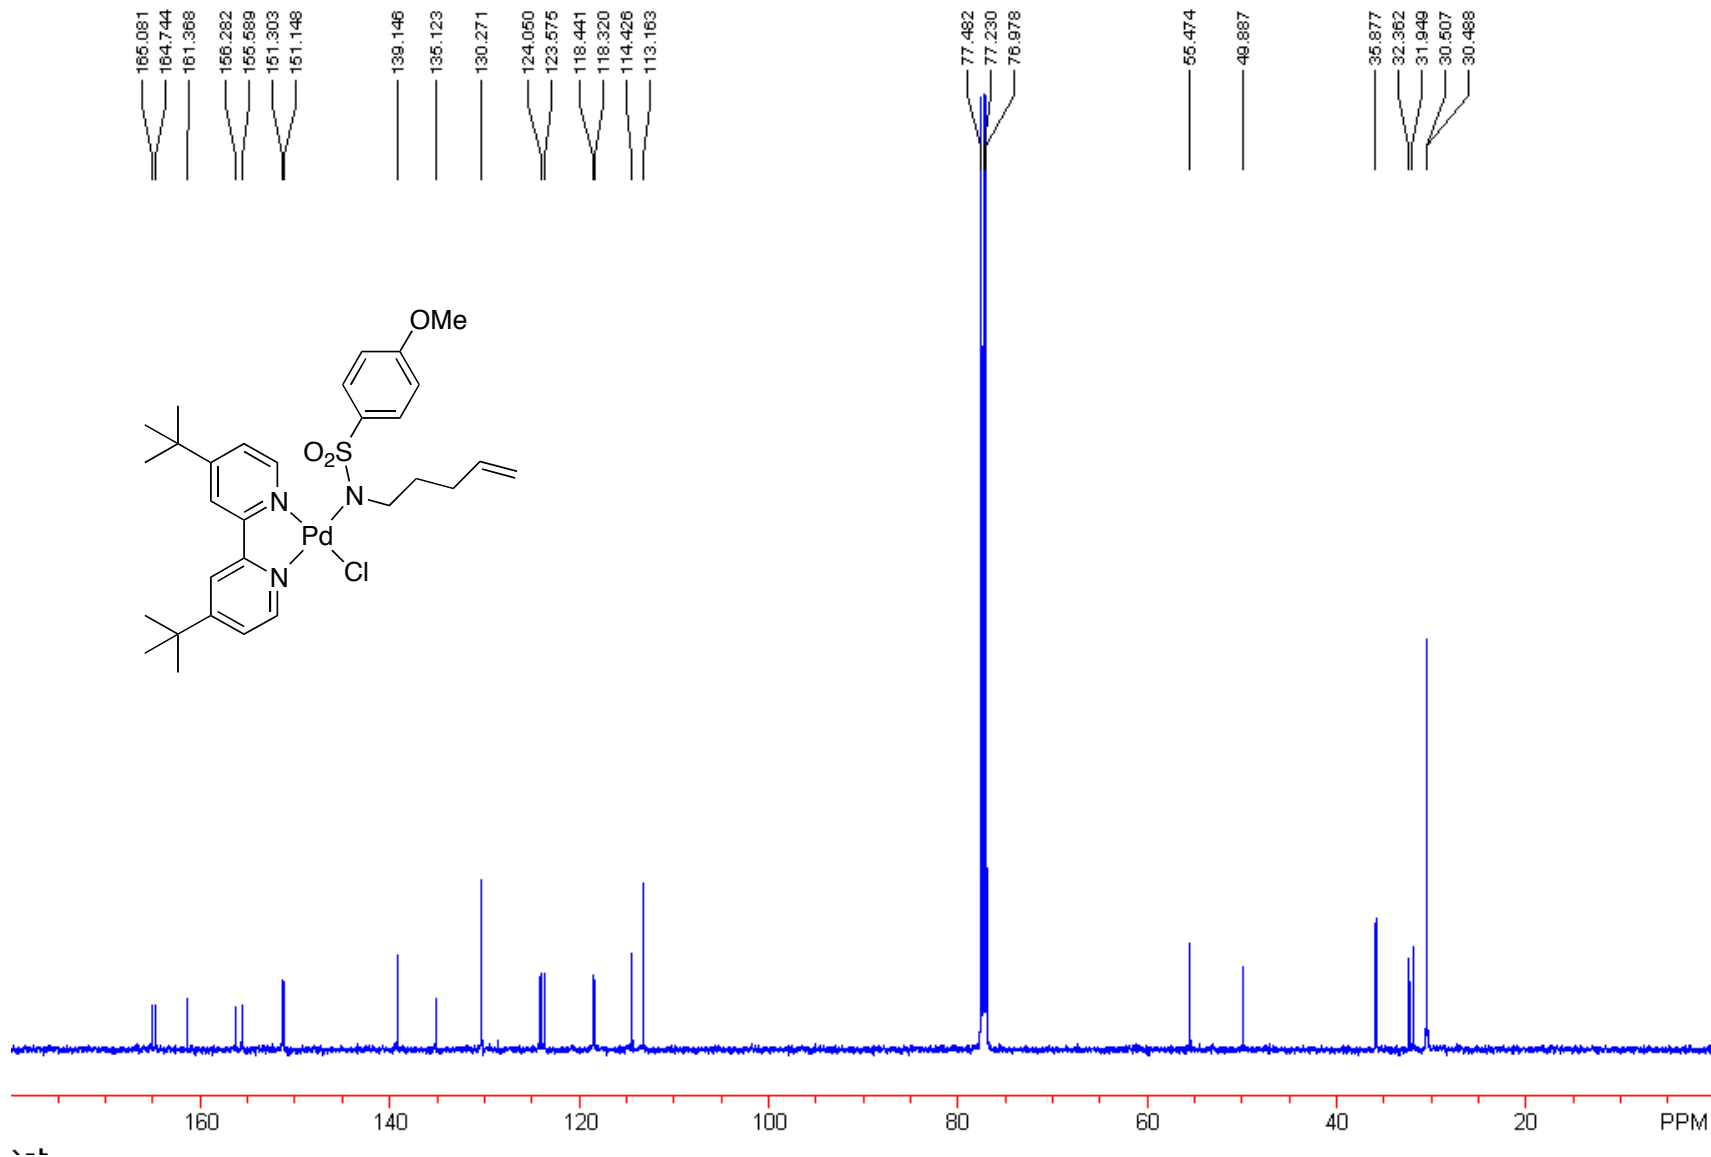

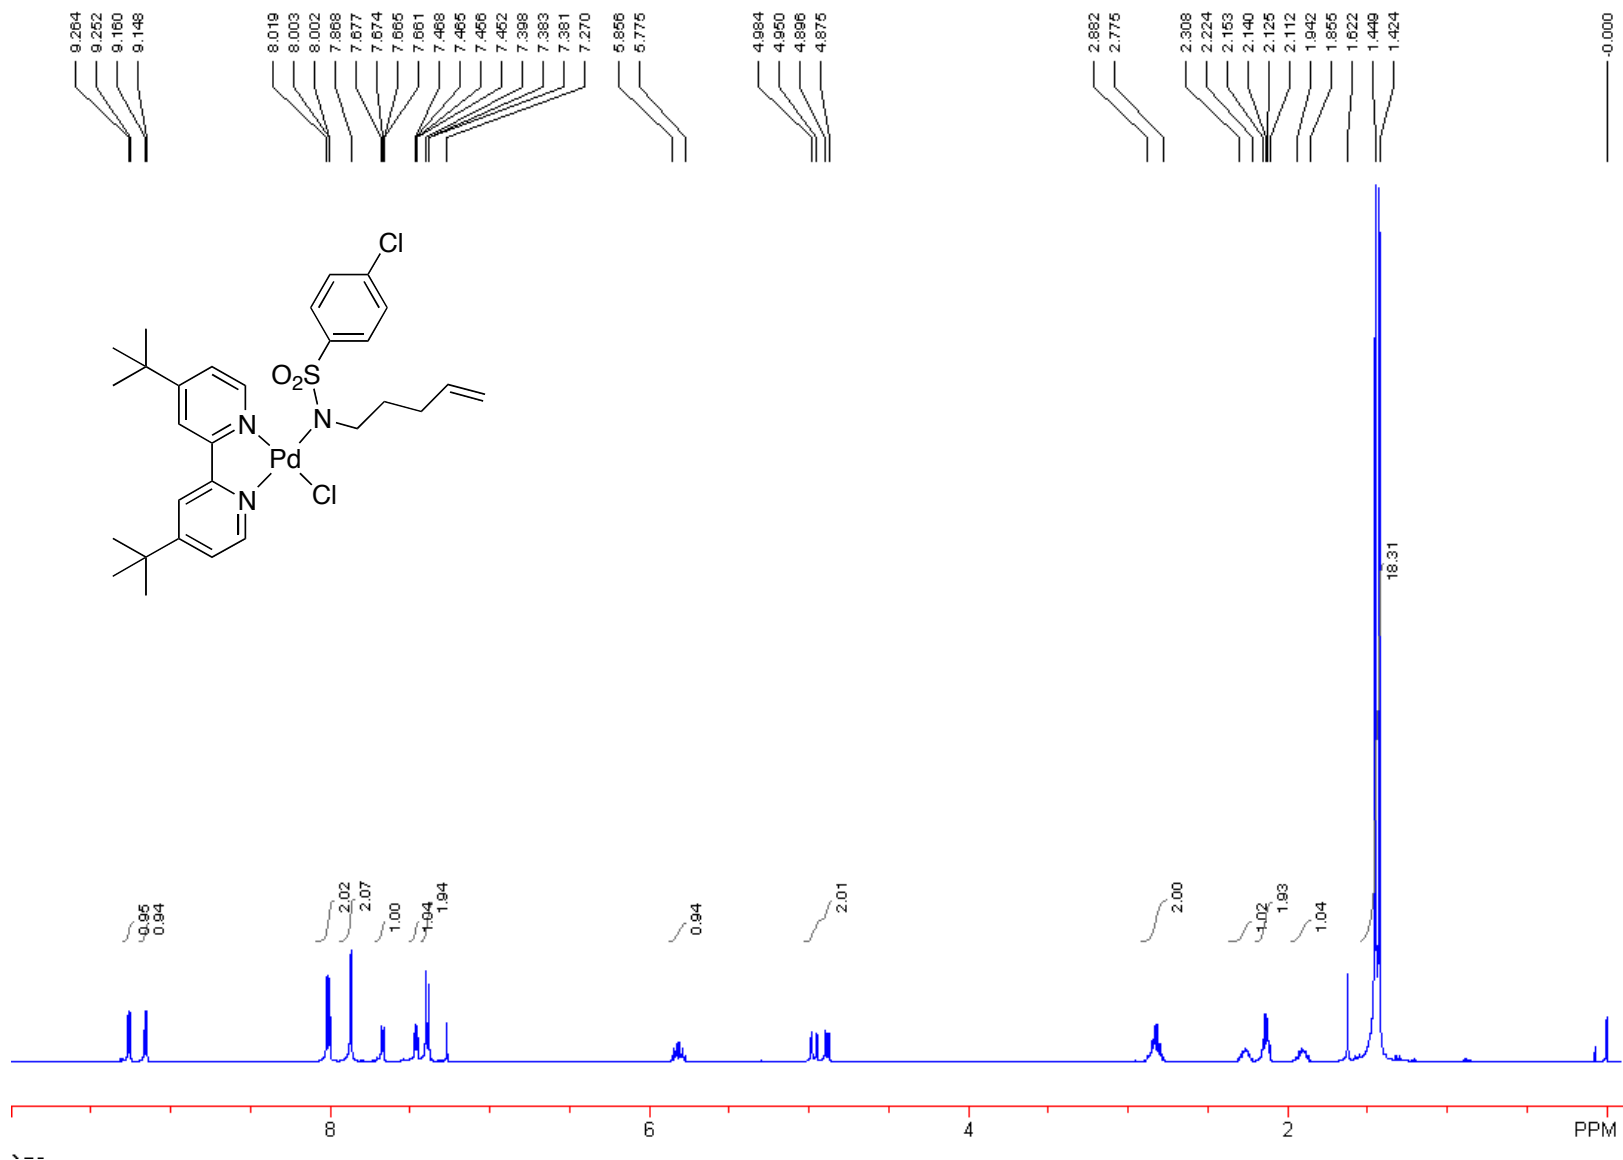



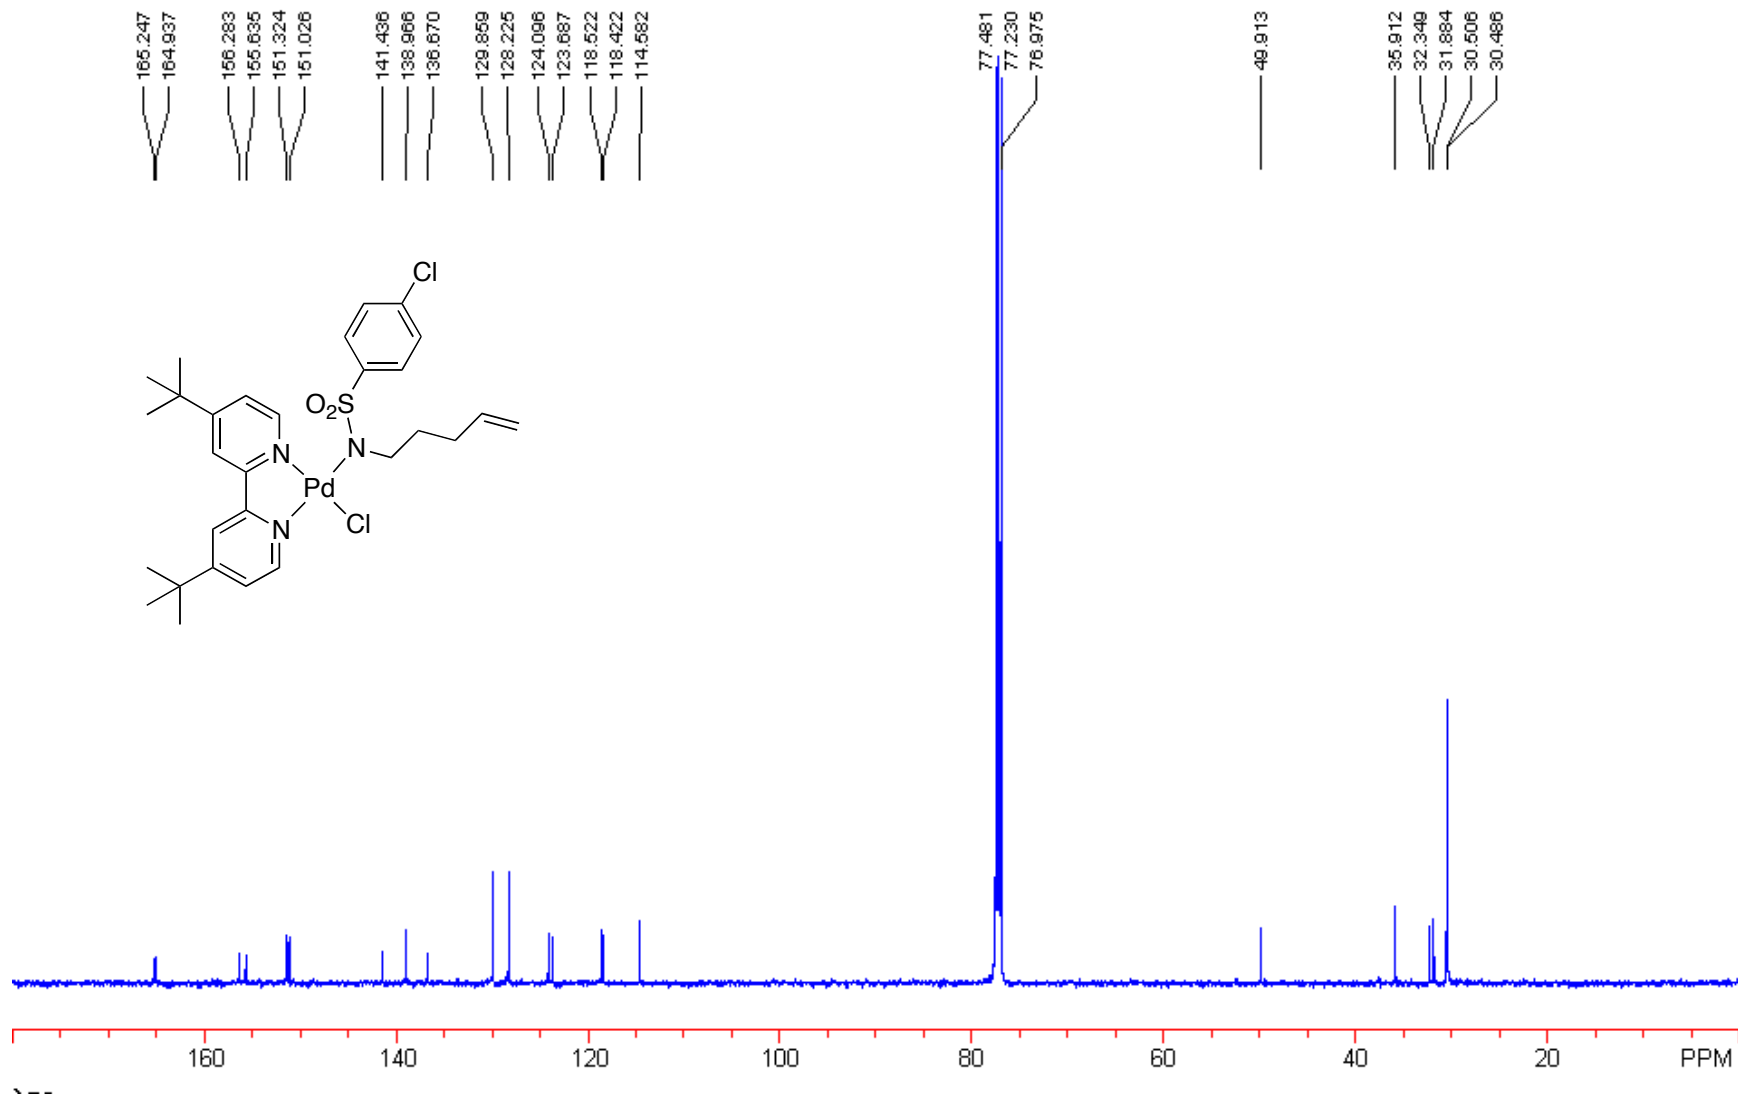

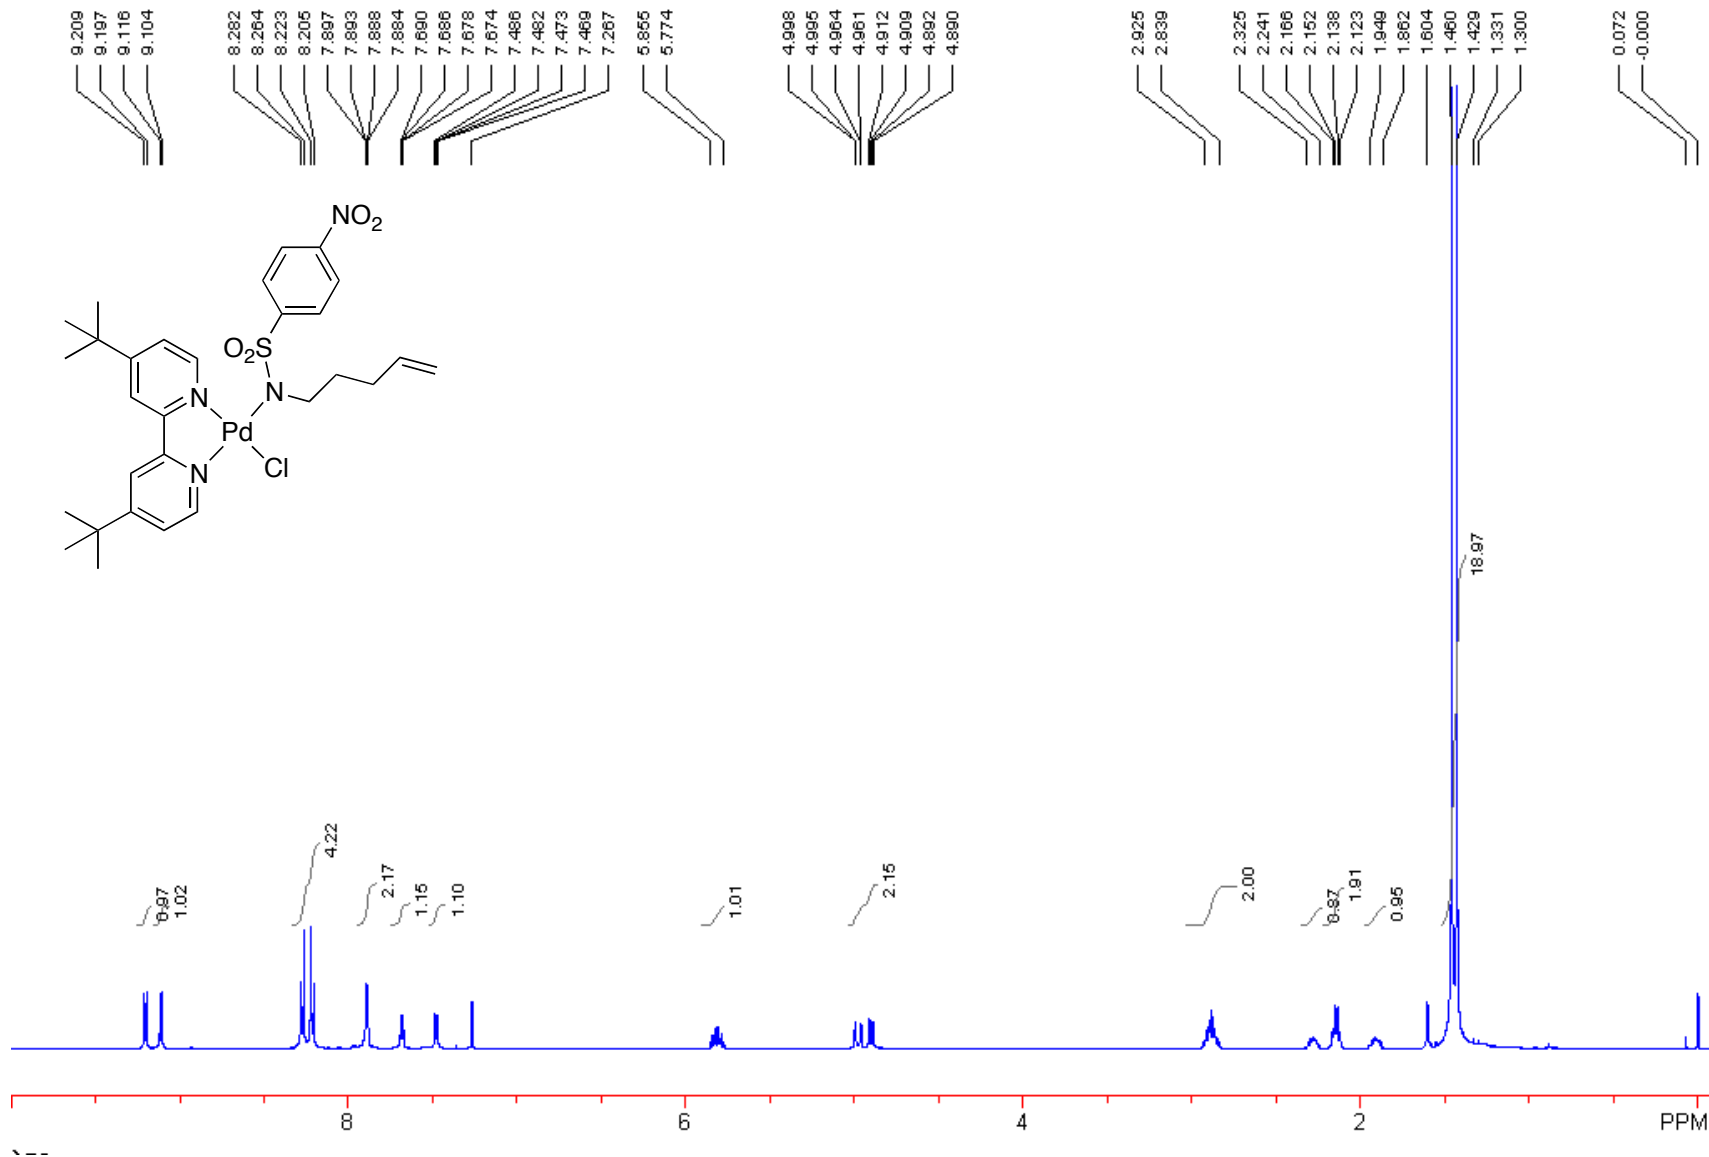

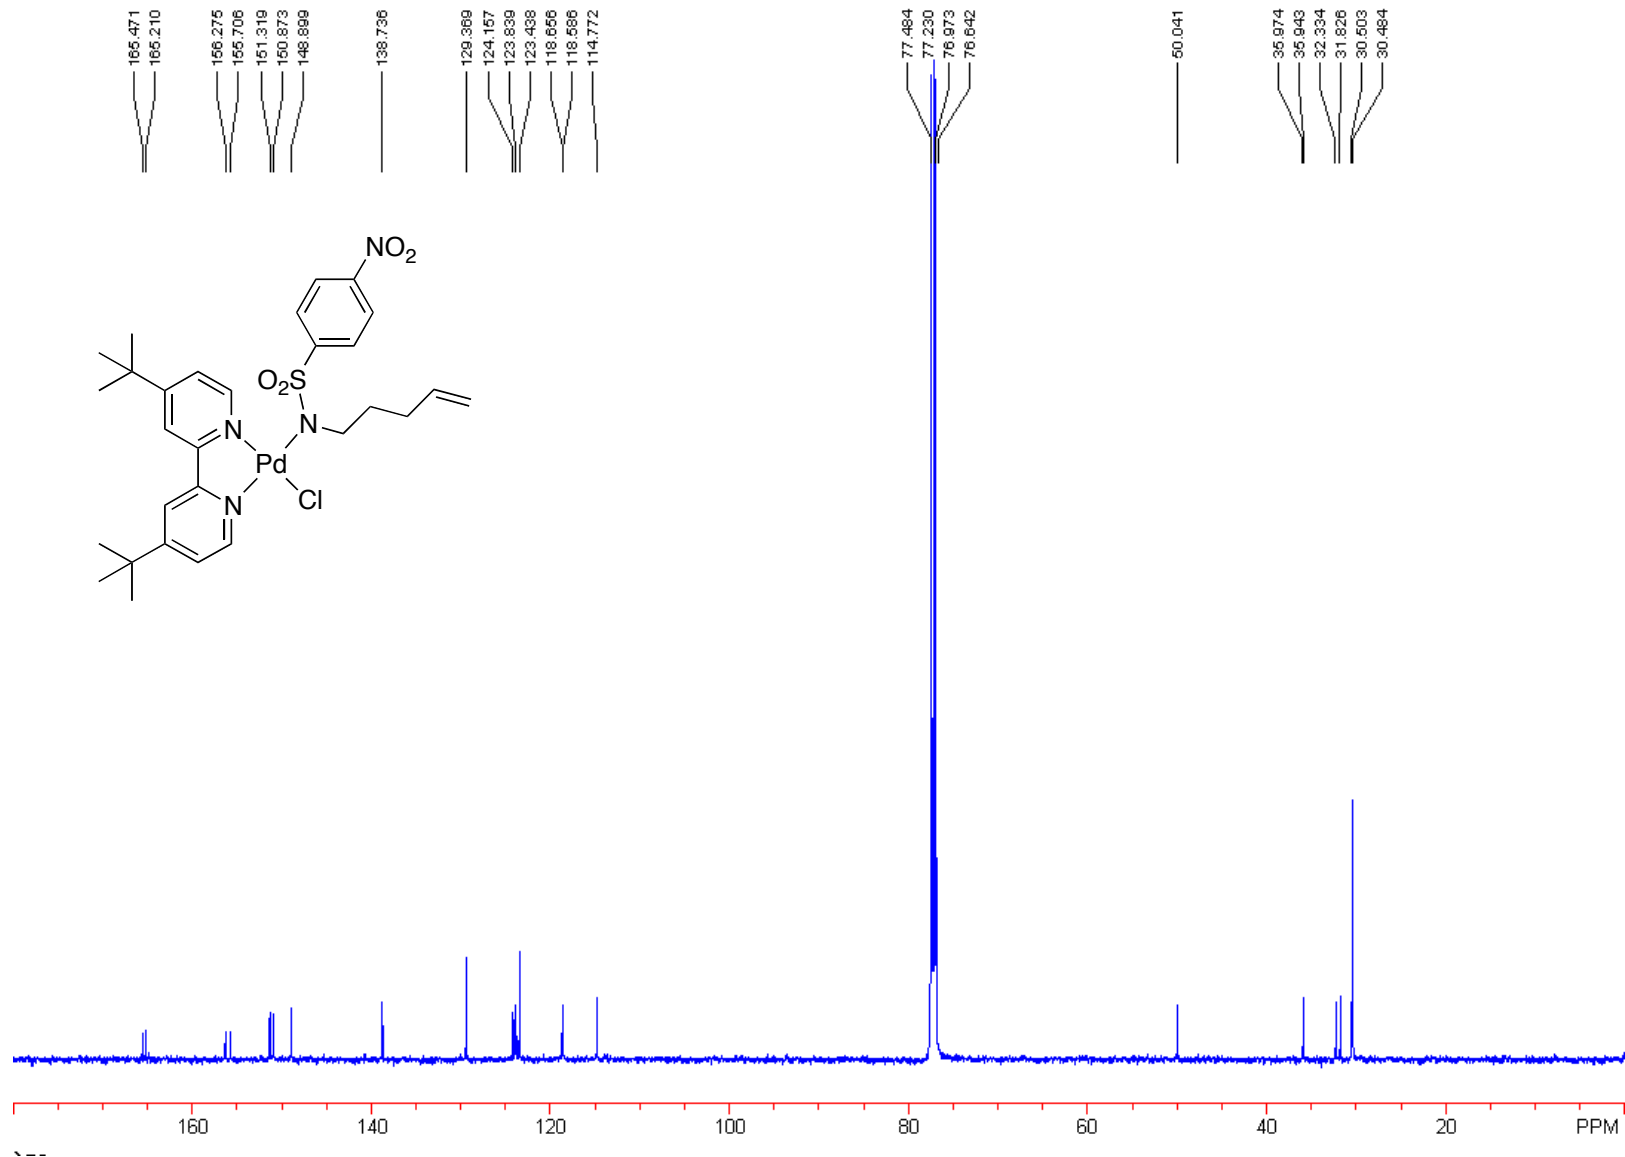

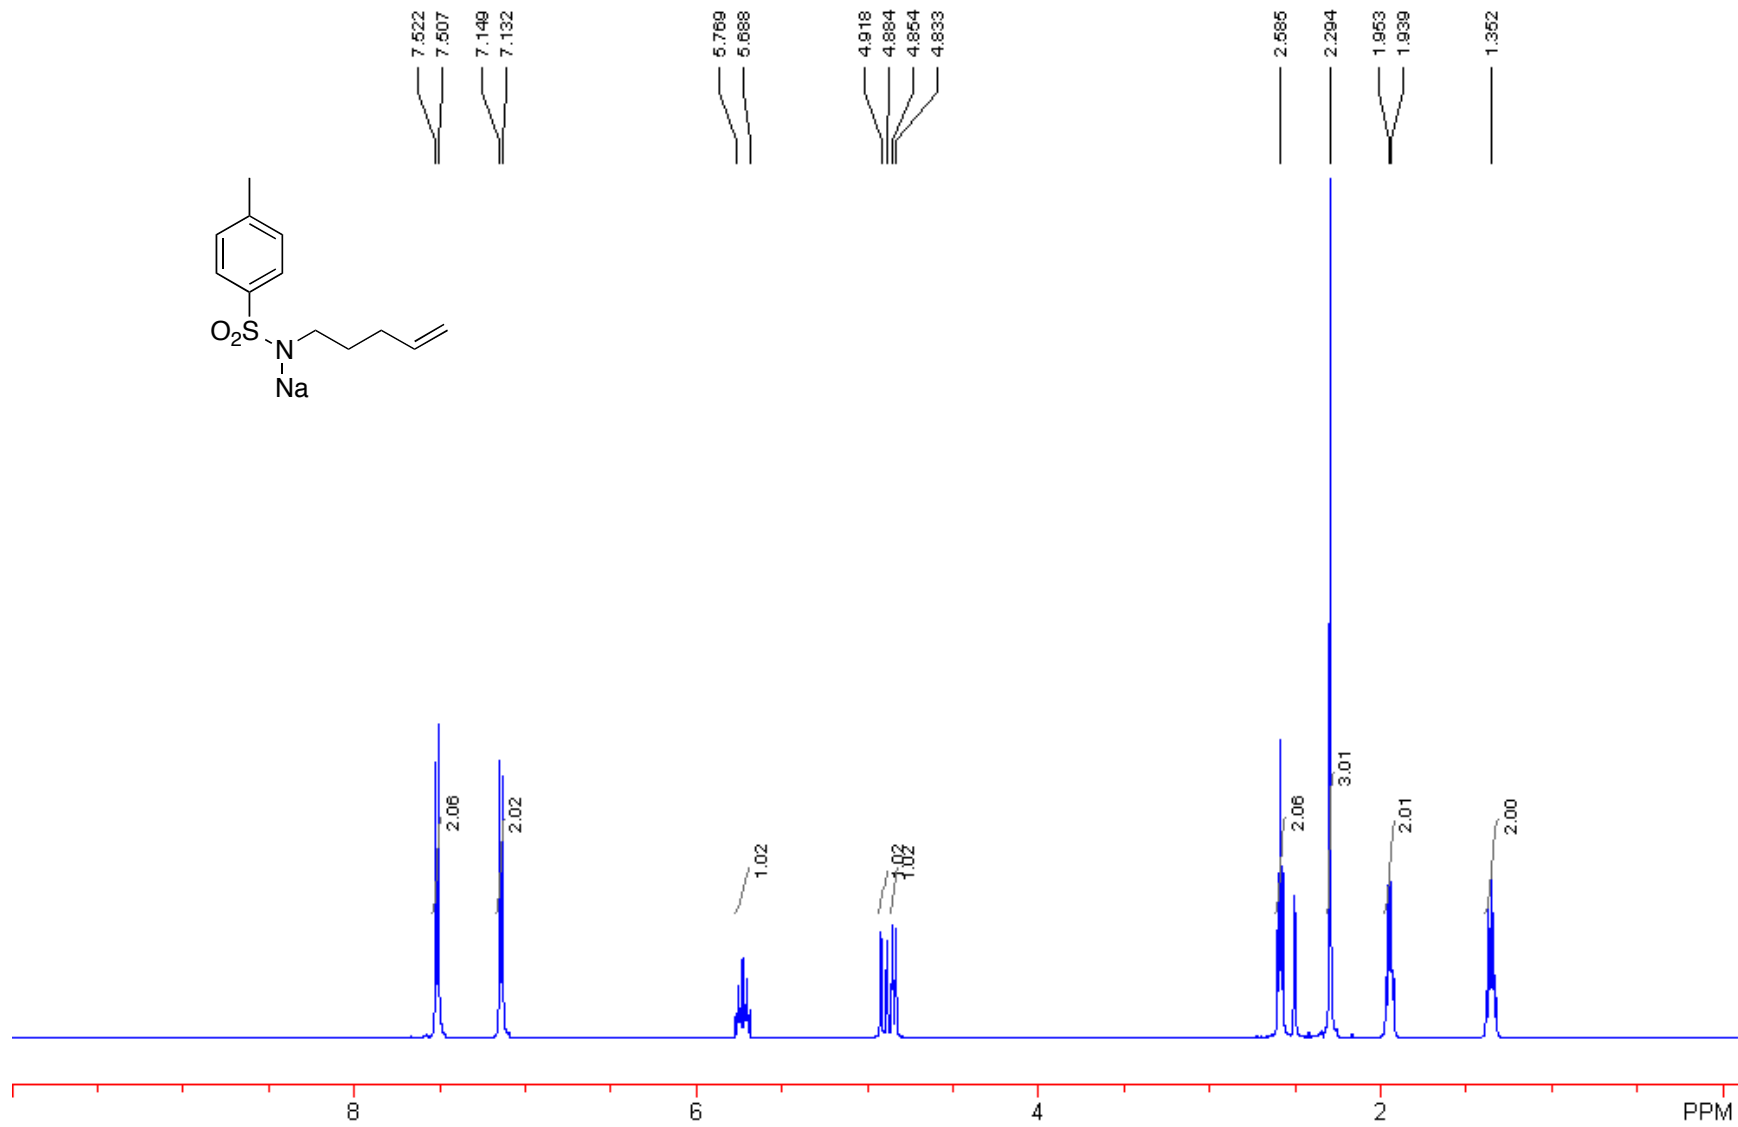

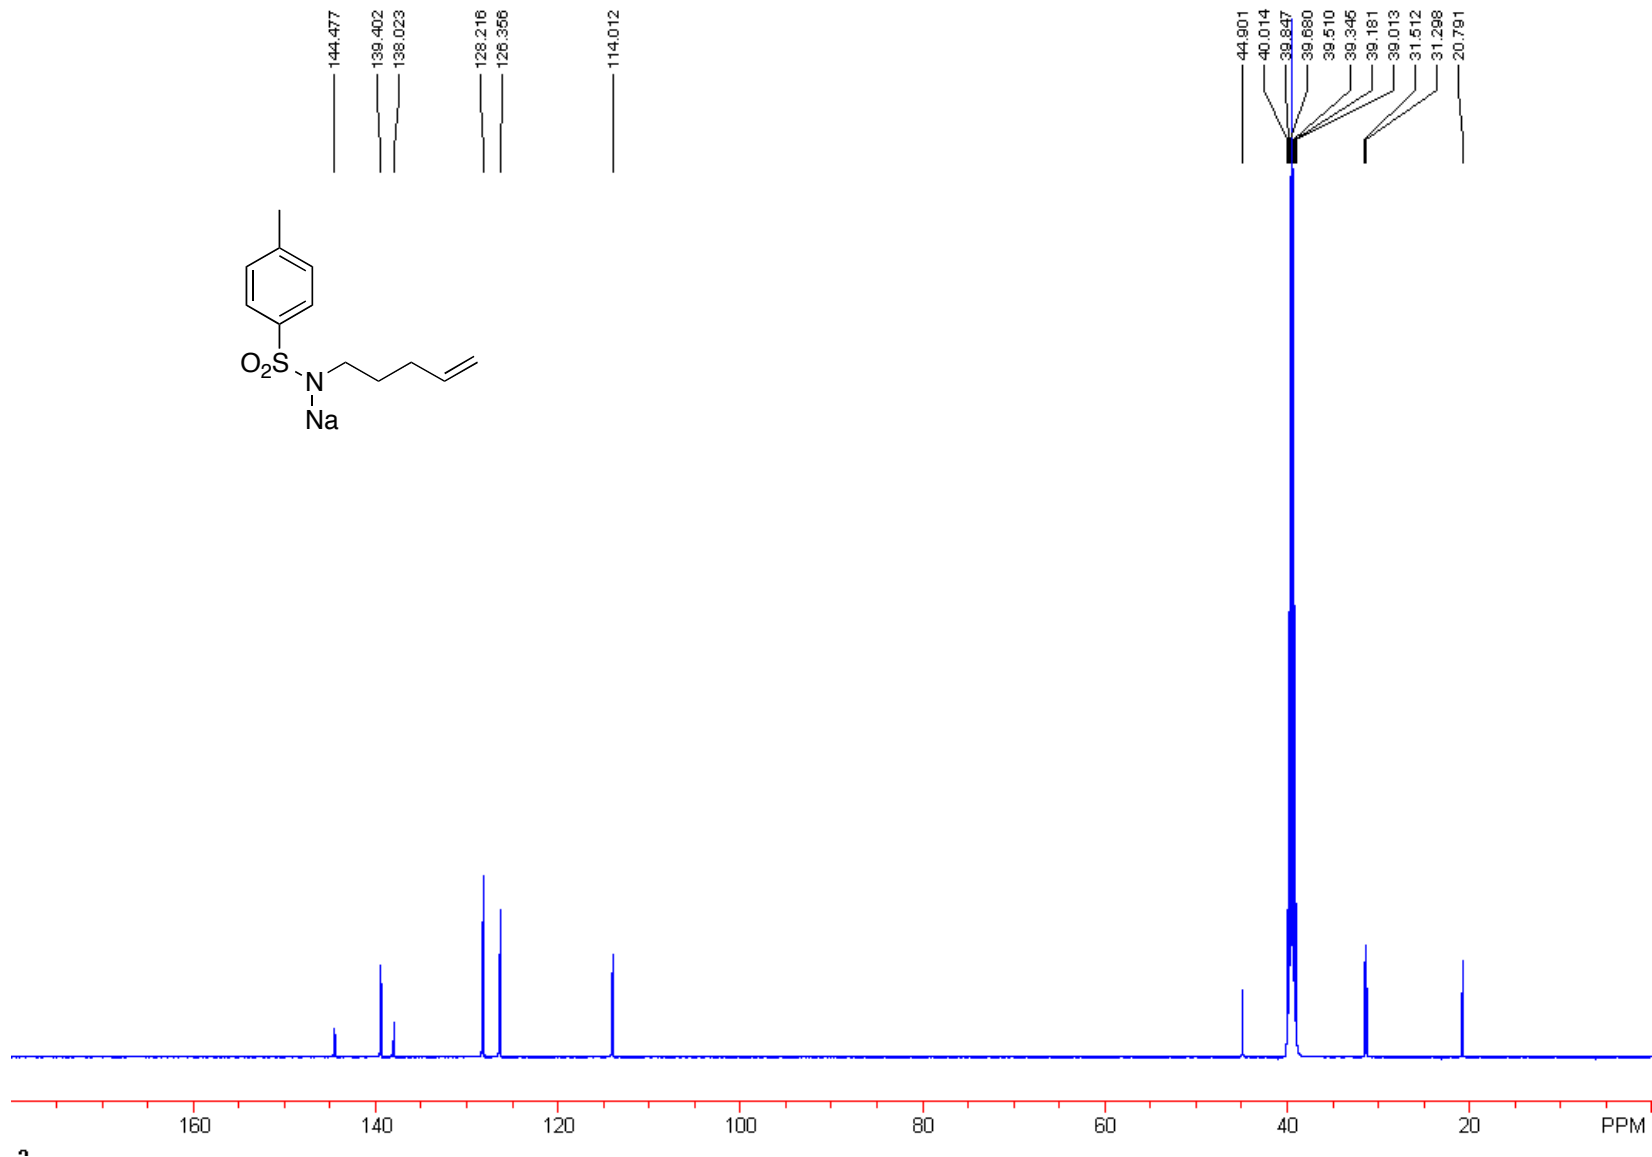

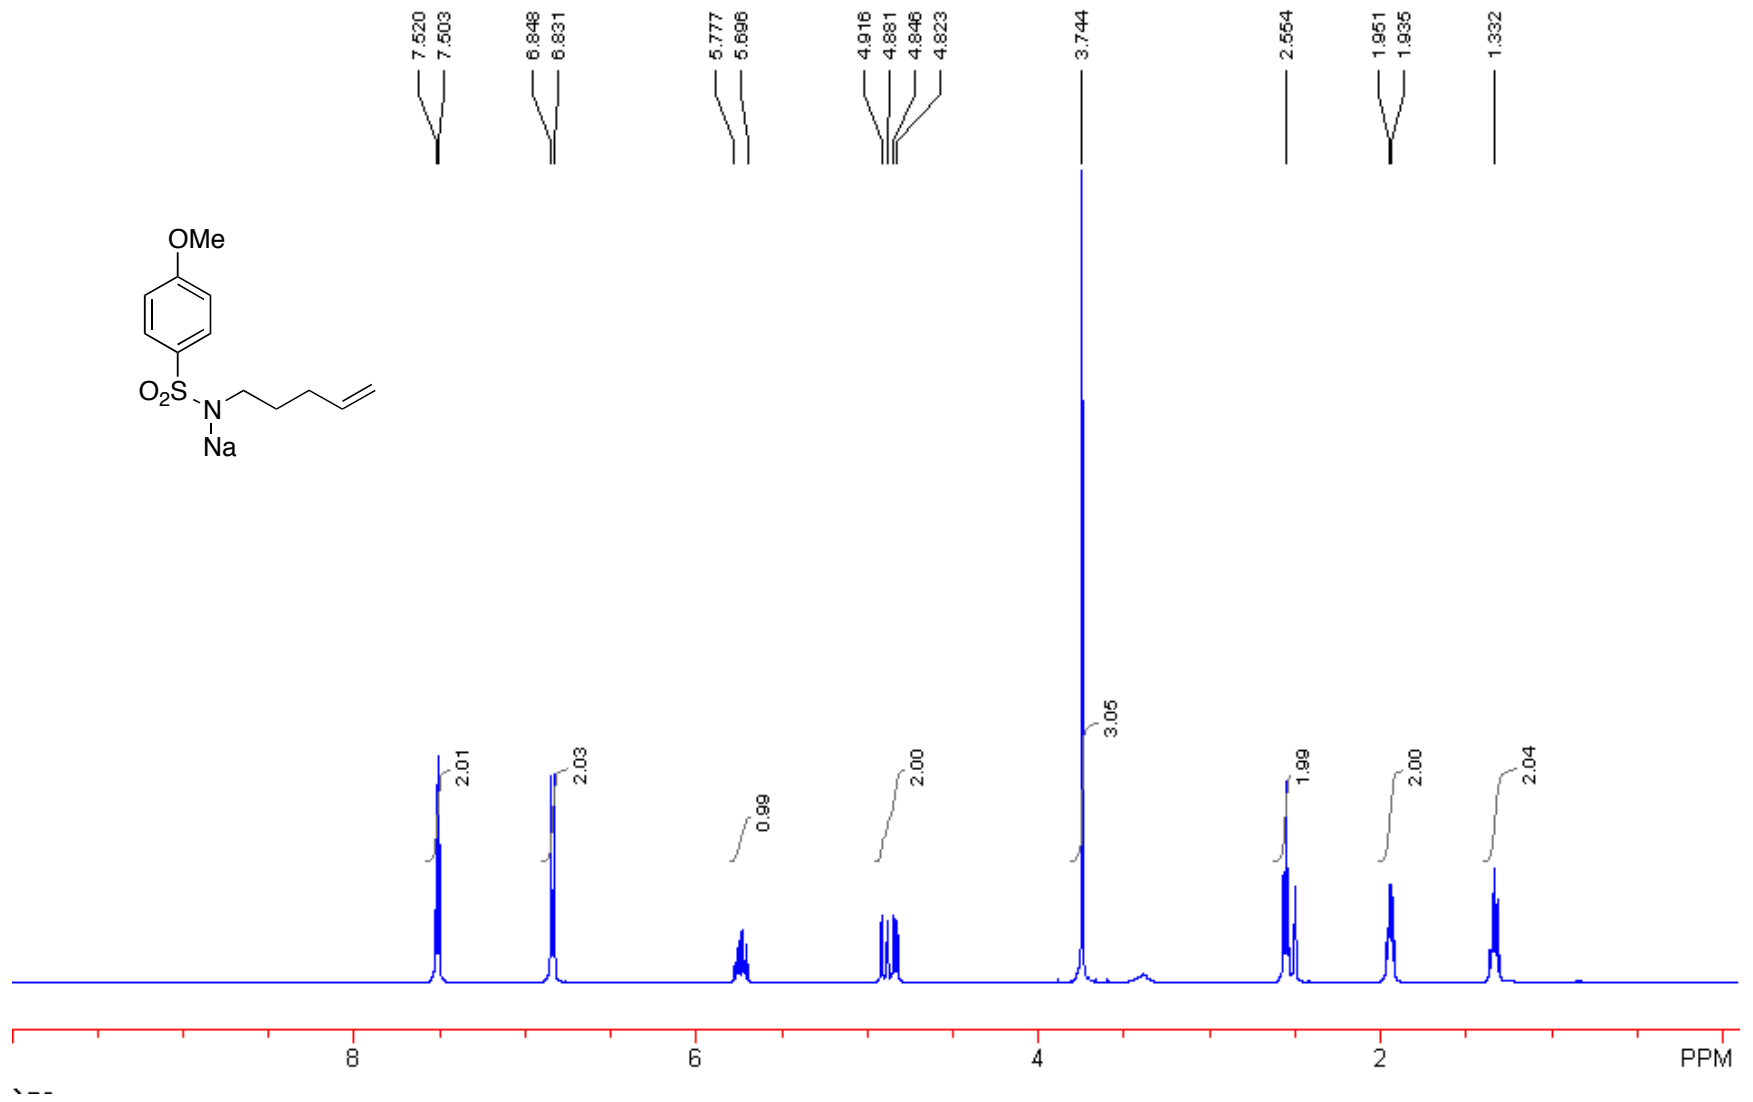

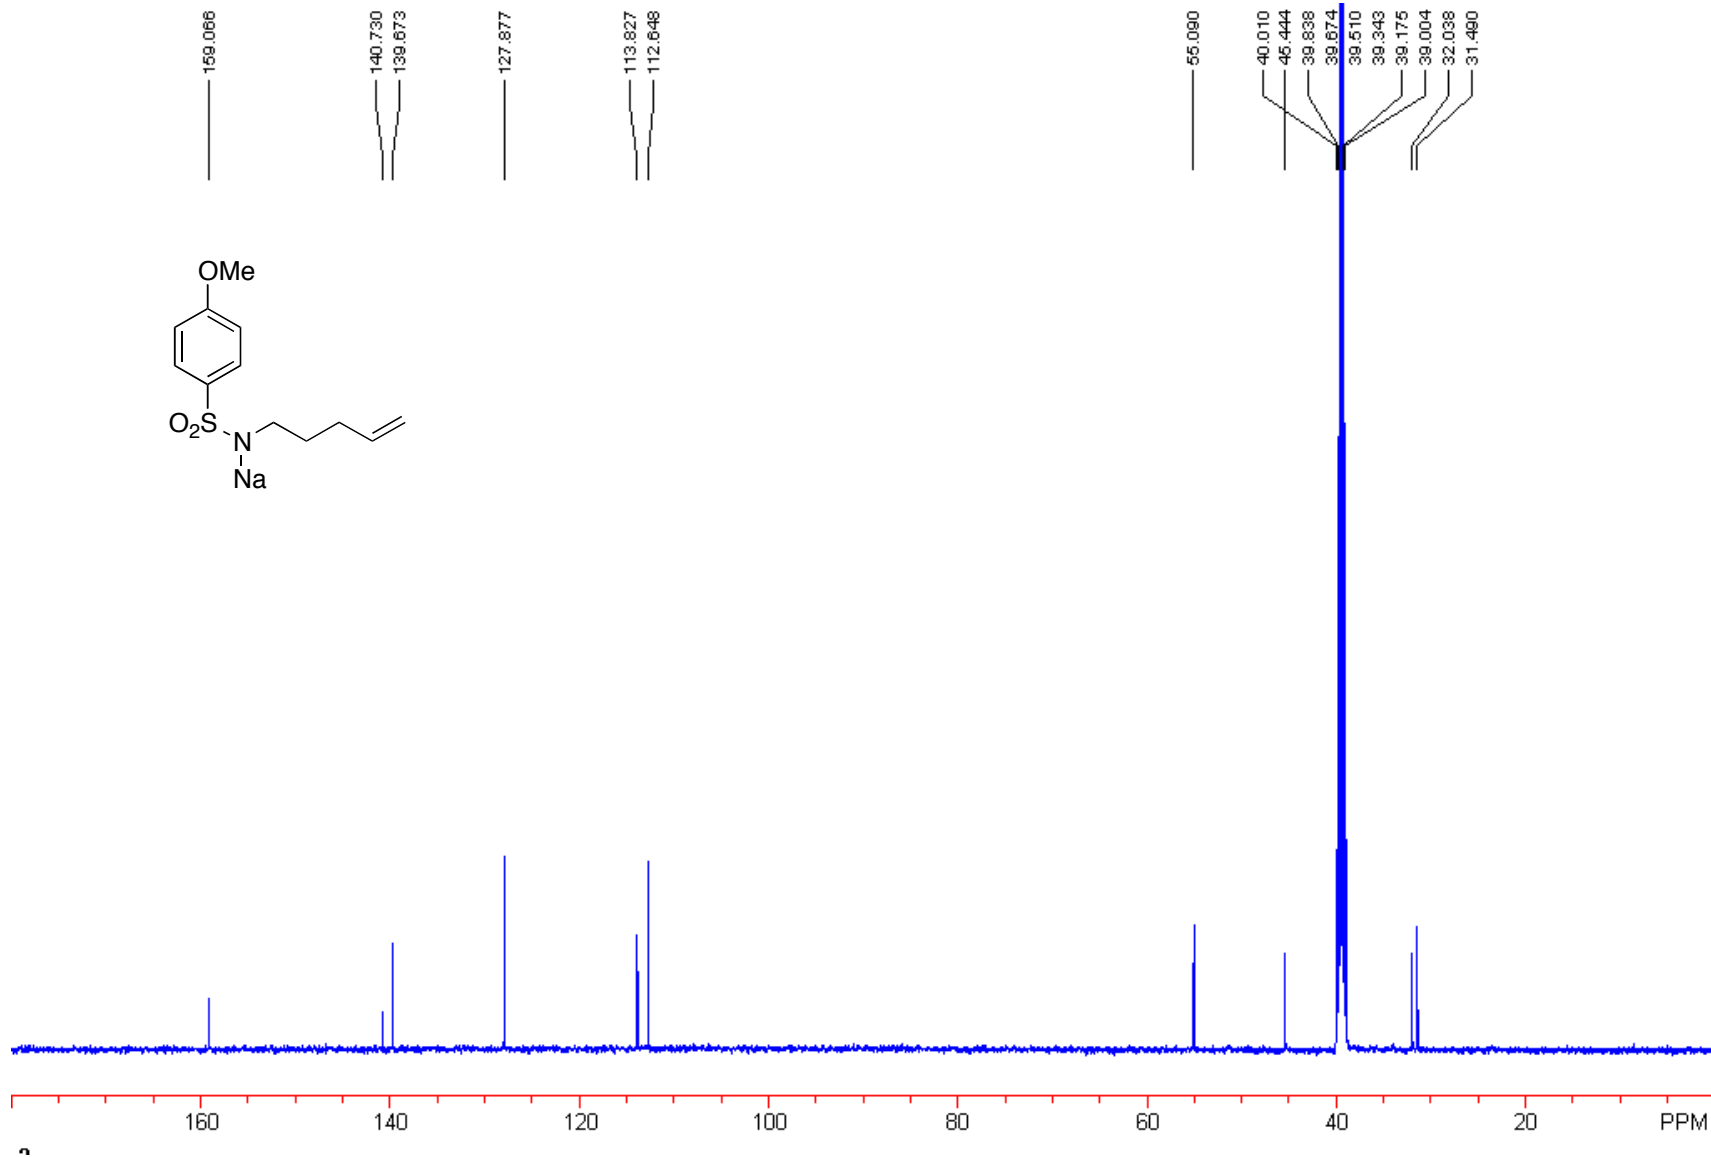

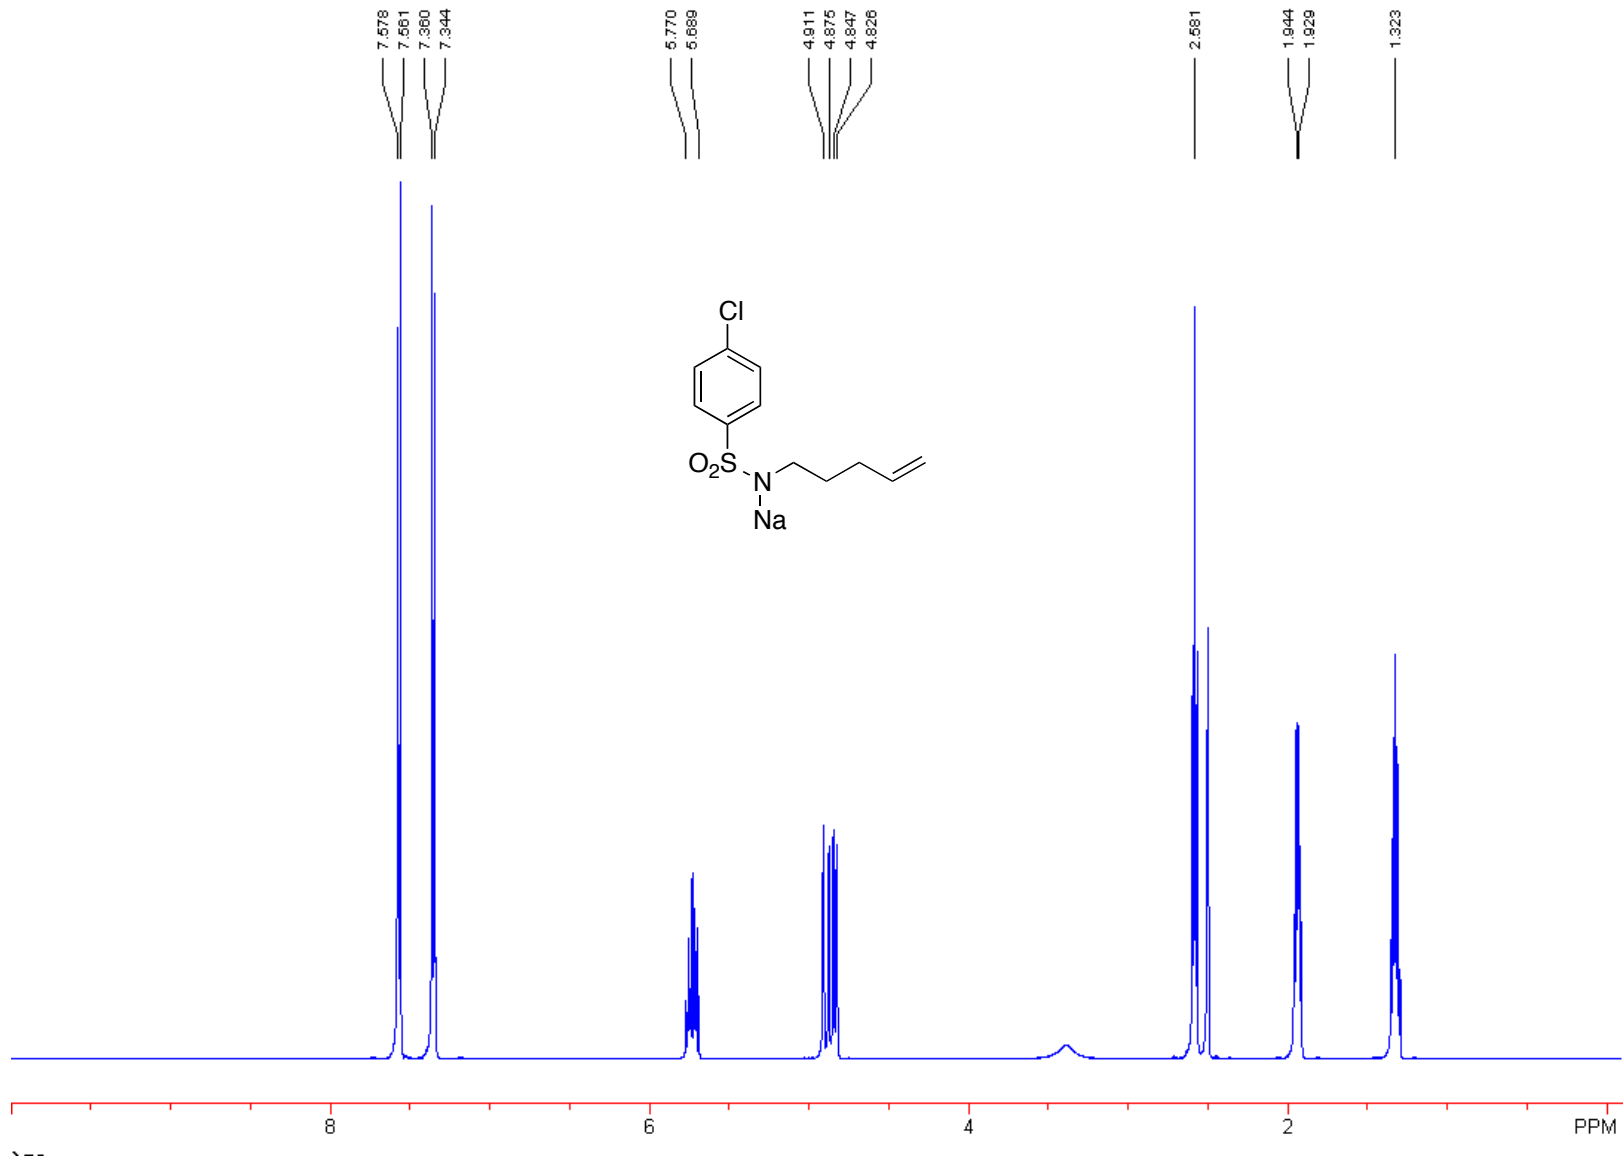



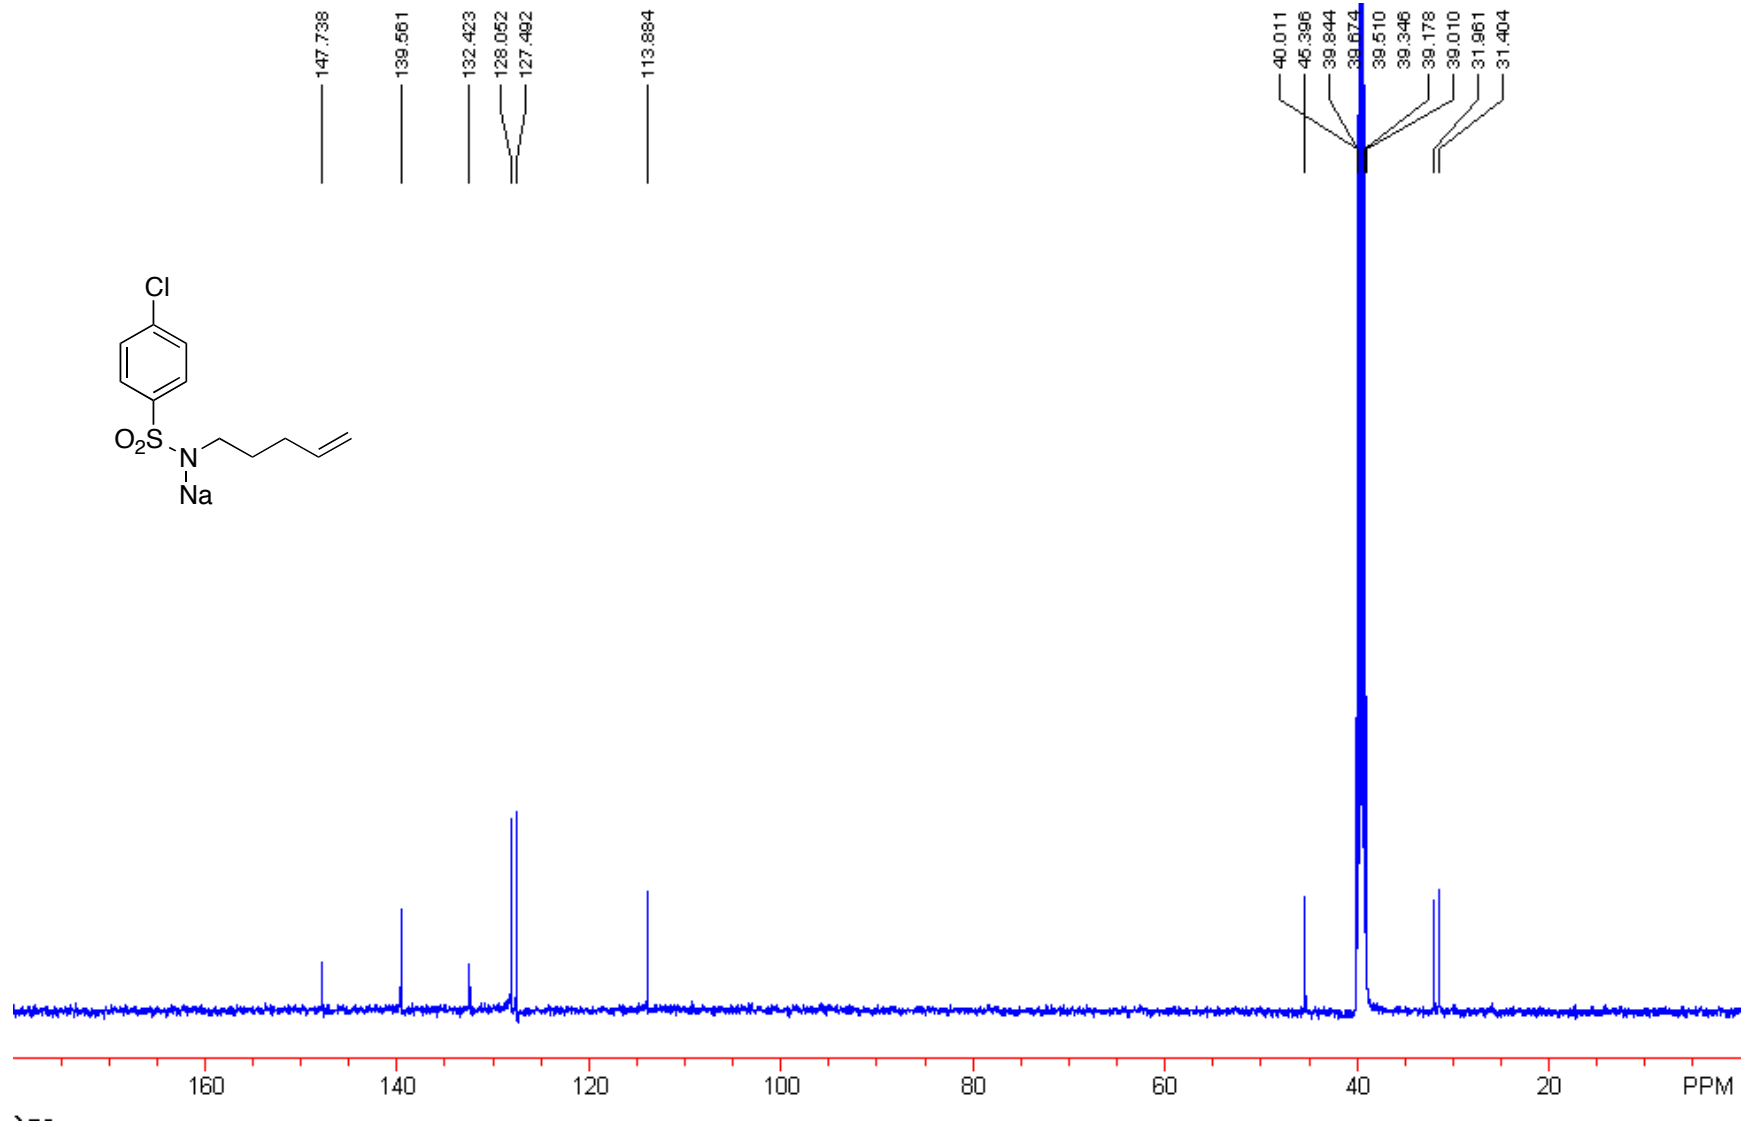

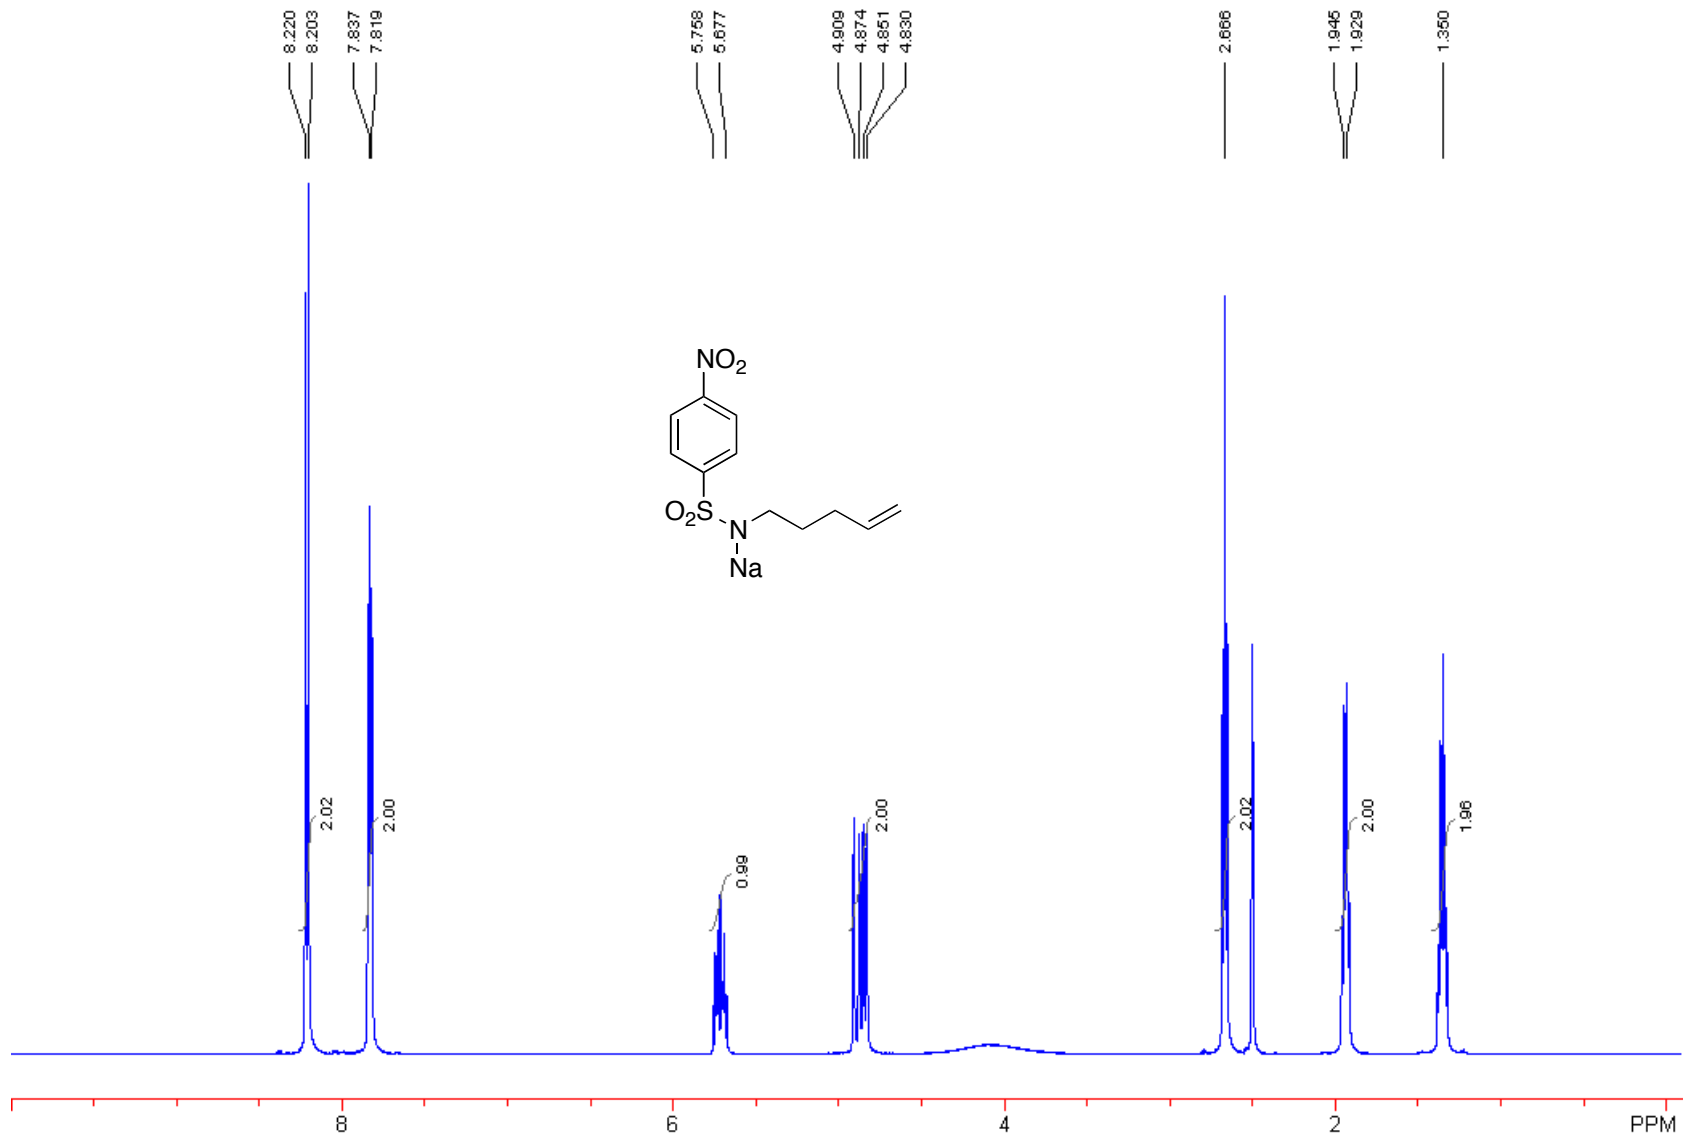

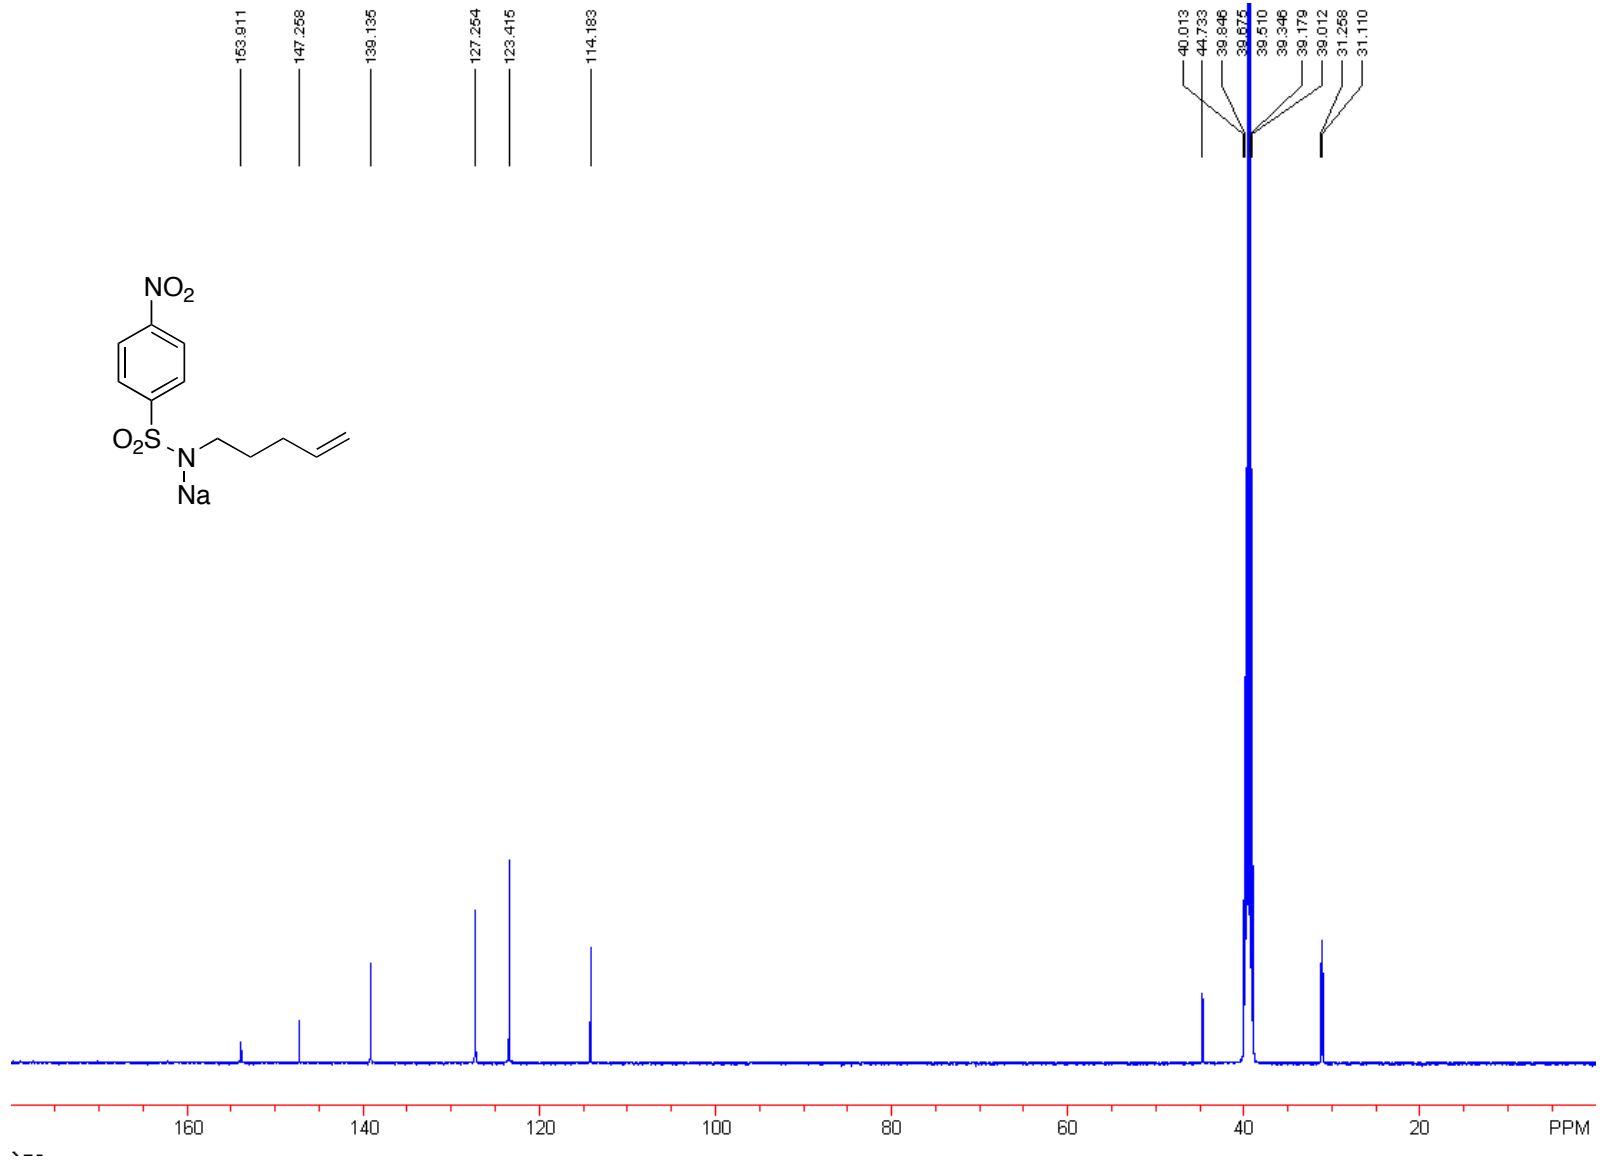

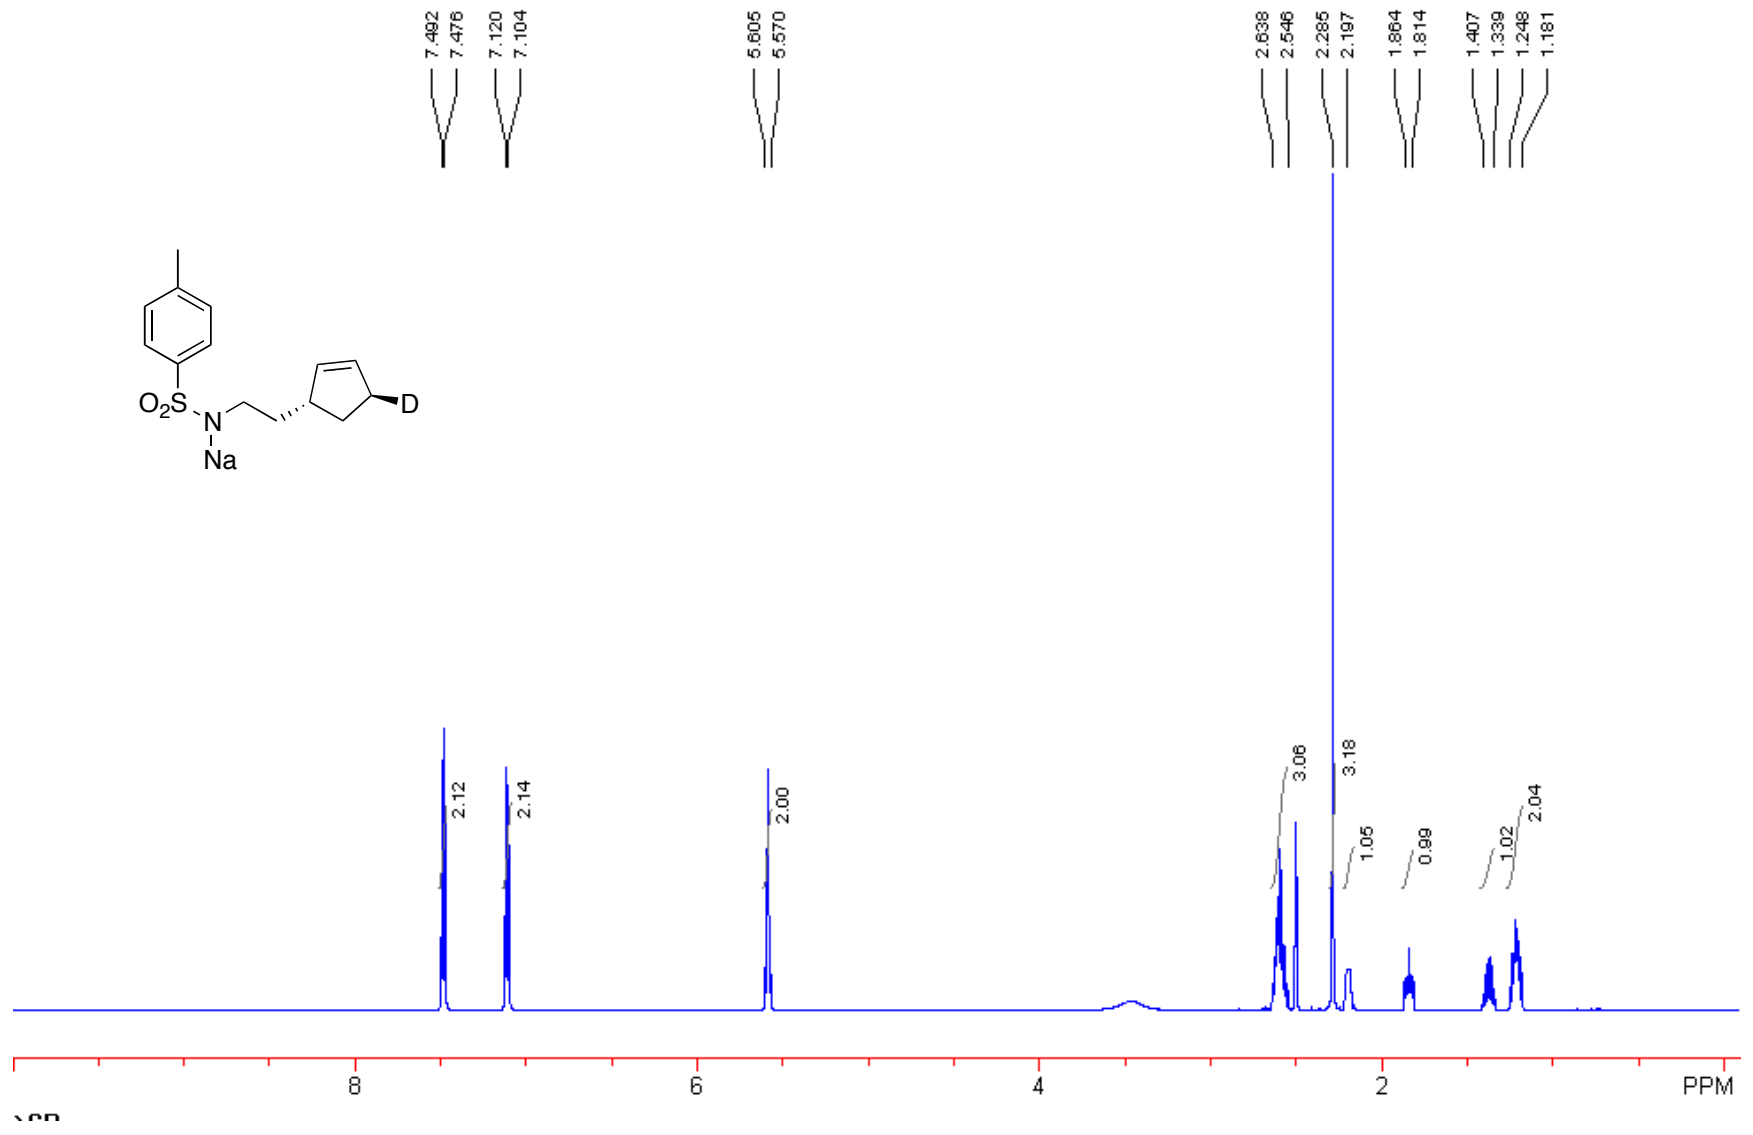

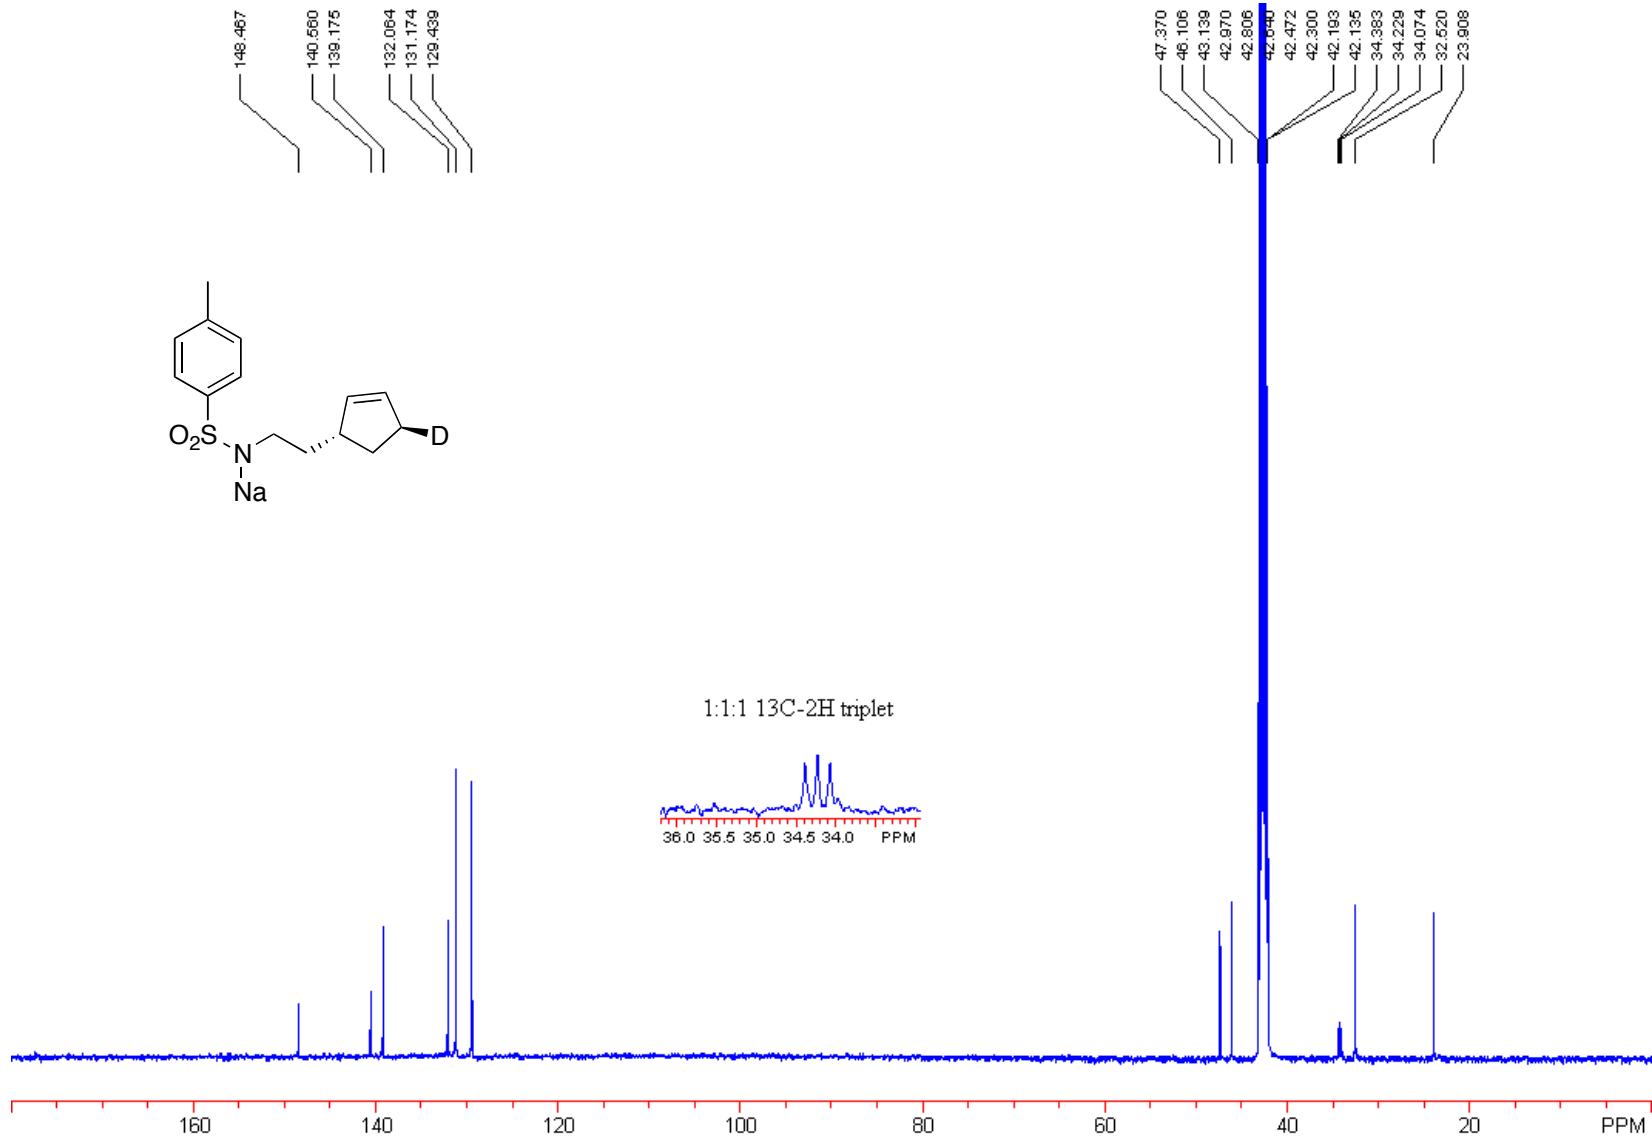

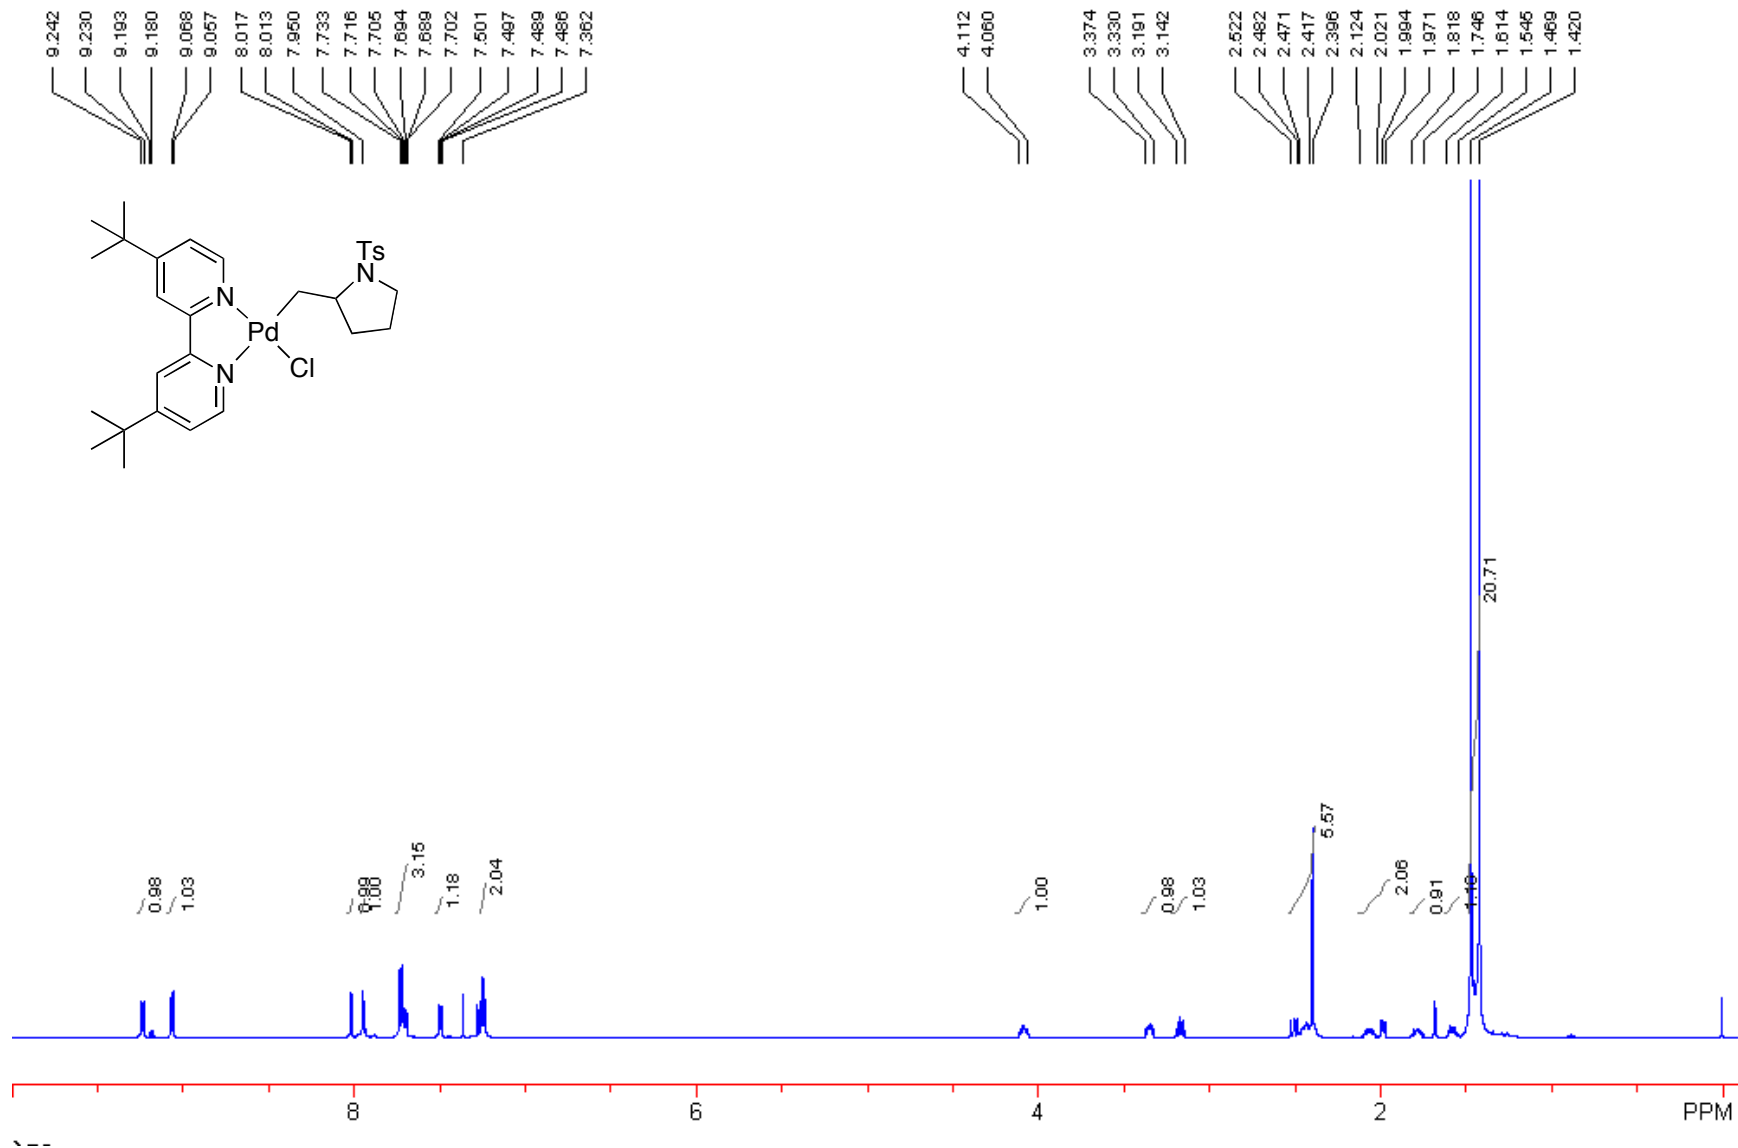

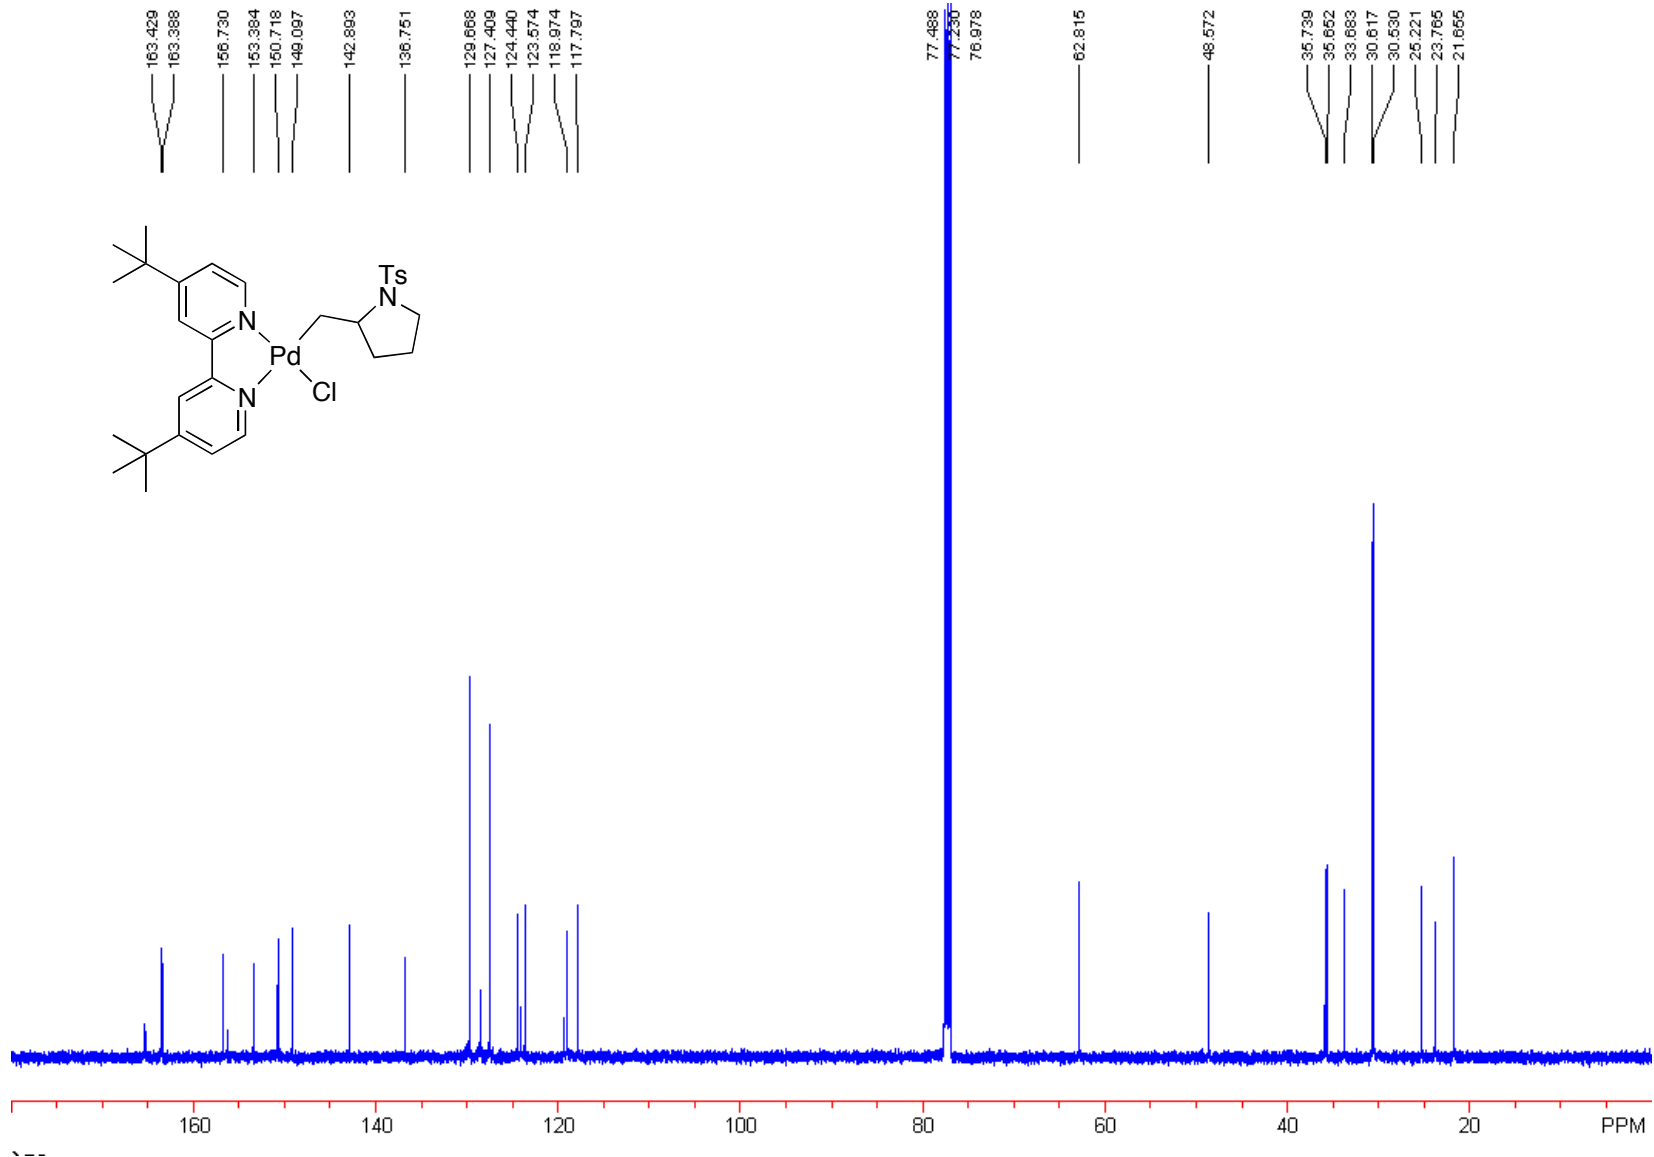

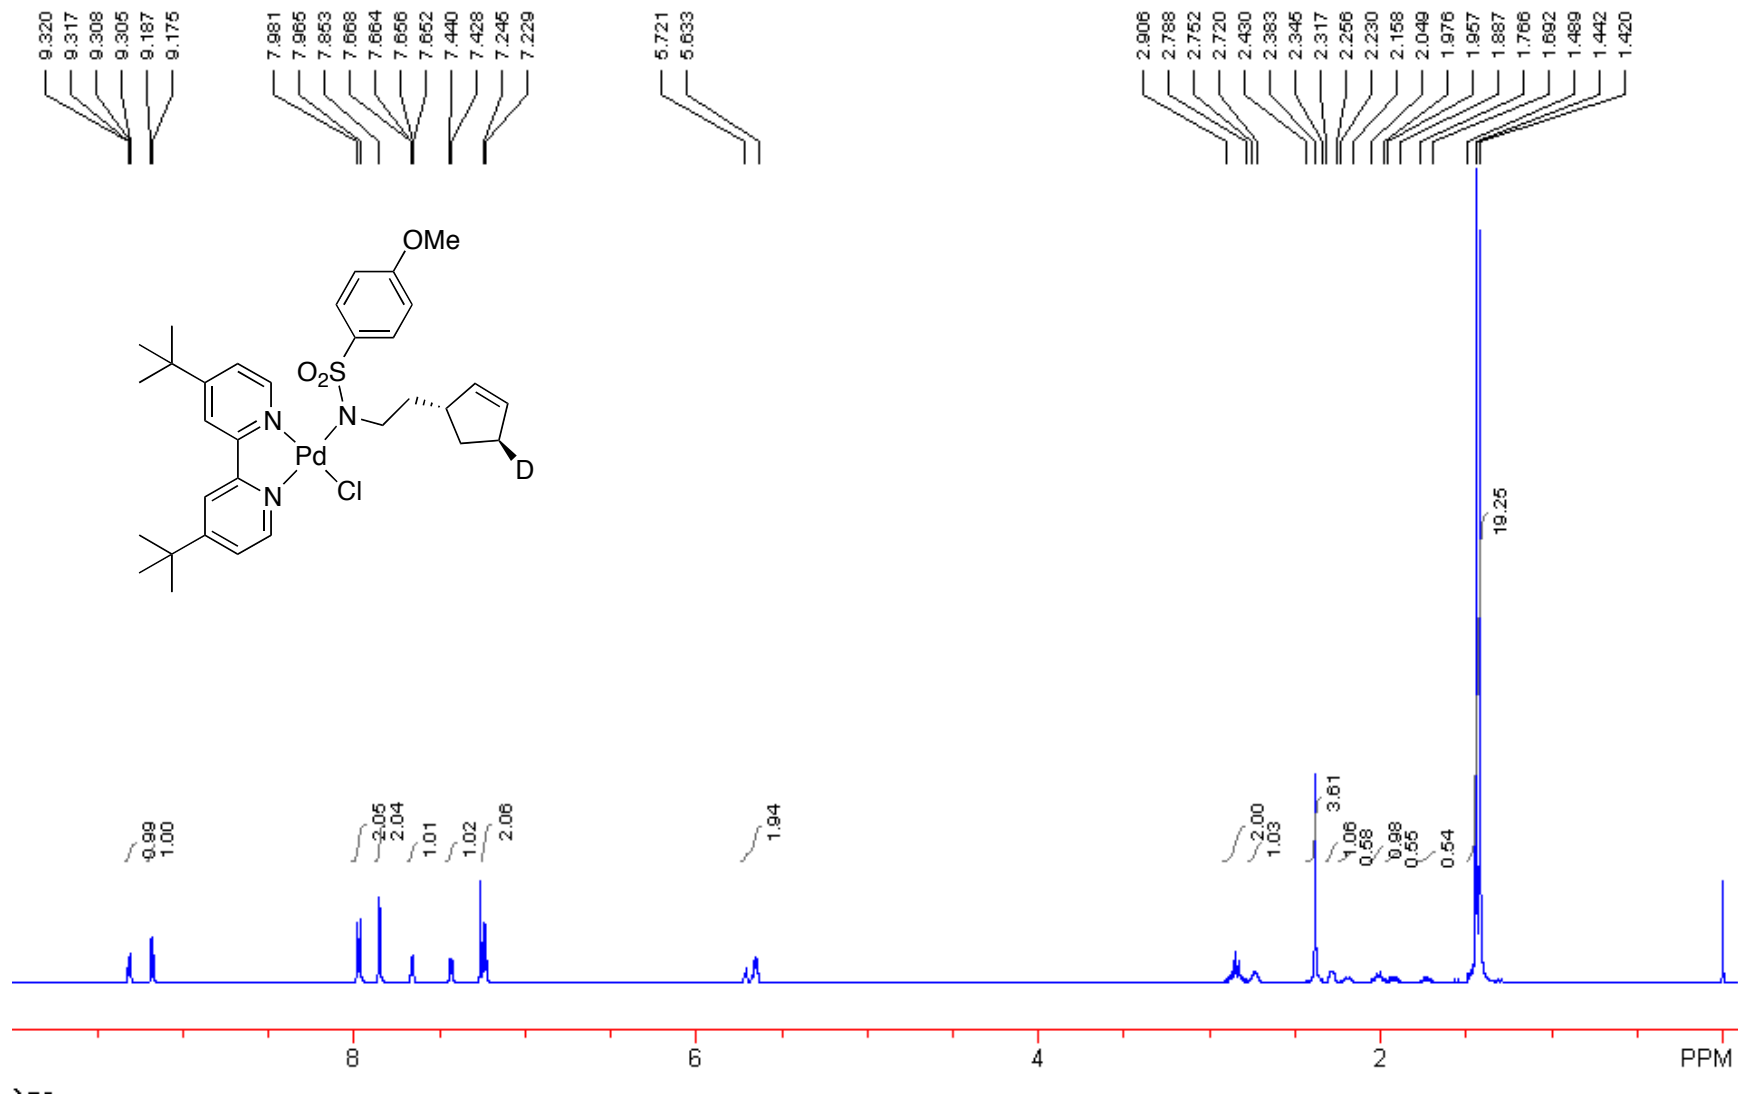



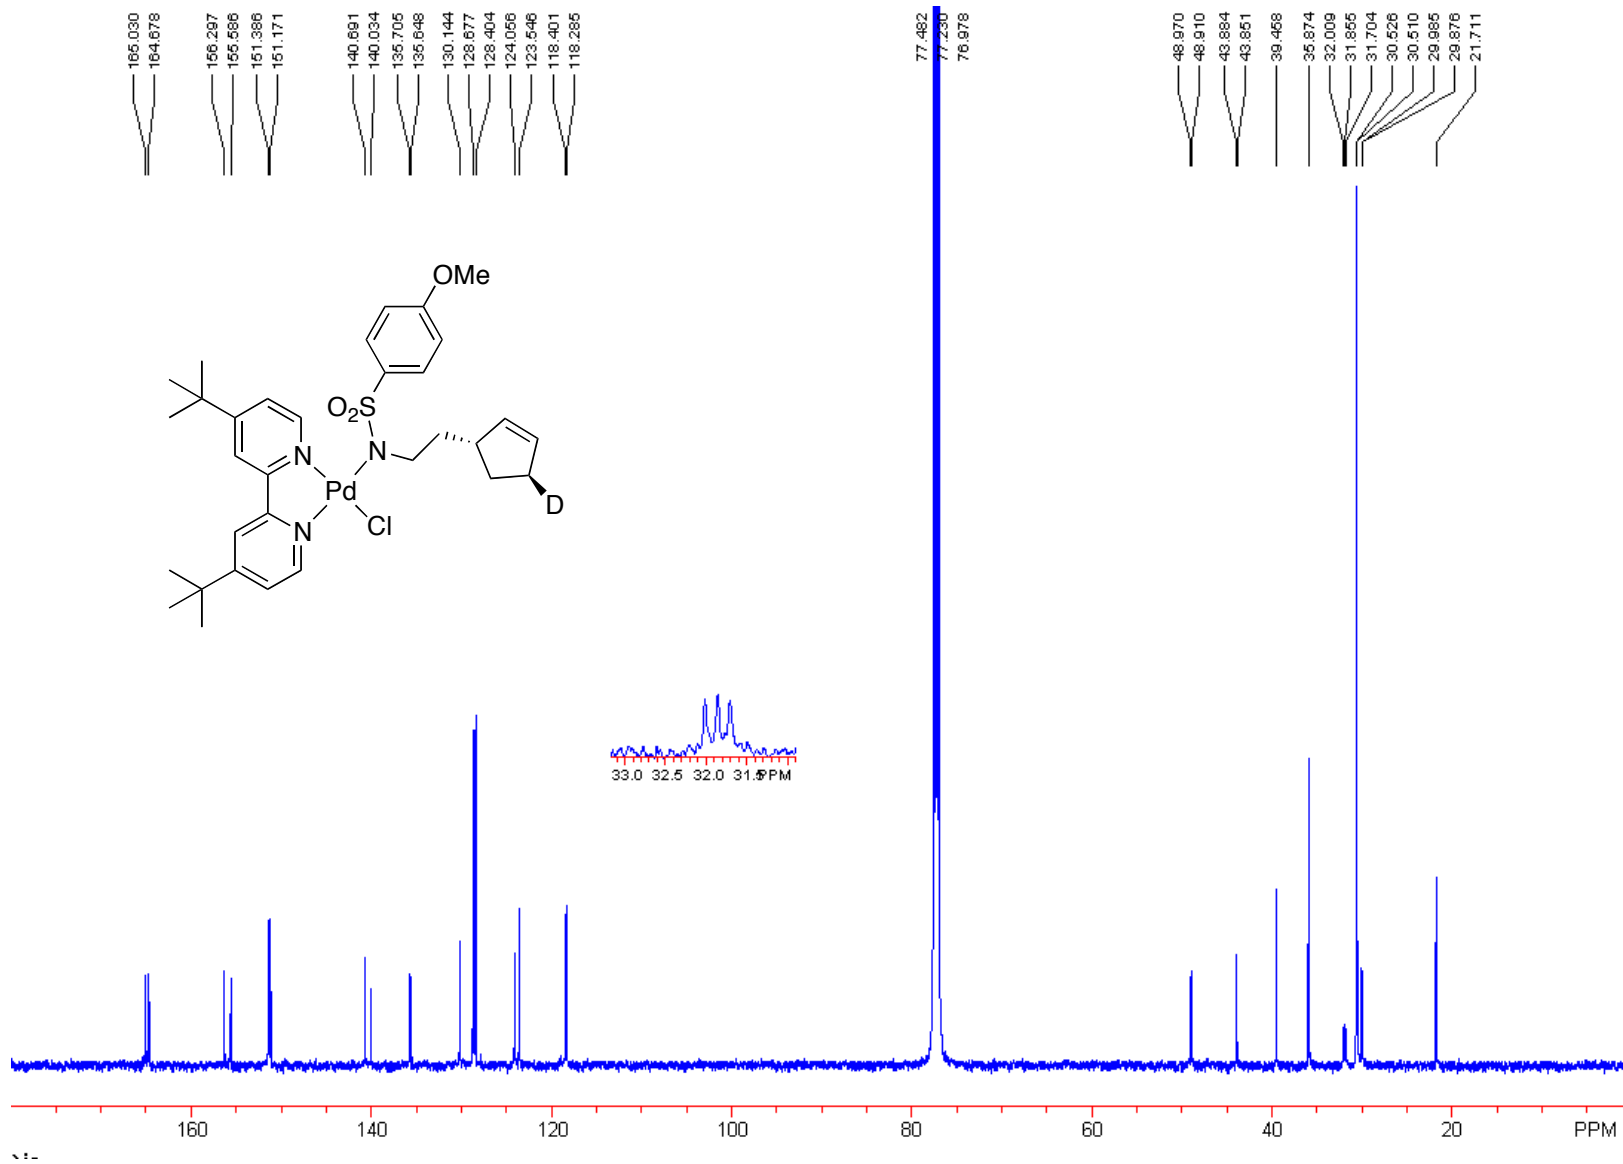

Supplement: NIHMS335907-supplement-2_si_002.pdf [file NIHMS335907-supplement-2_si_002.pdf]
